# Supplementary material for: Confined space synthesis of fully alloyed and sinter-resistant AuPd nanoparticles encapsulated in porous silica
Source: Royal Society of Chemistry journal article supplement (doi:10.1039/c3ta15194h), 2014-01-01
Supplement: c3ta15194h.pdf [file c3ta15194h.pdf]

## Supporting Information

### Confined space synthesis of fully alloyed AuPd nanoparticles

#### encapsulated in porous silica

*Anupam Samanta, Thattarathody Rajesh and R. Nandini Devi\**

Catalysis and Inorganic Chemistry Division, National Chemical Laboratory, Pune  
411008, India.

#### Experimental Section

##### Synthesis of porous-silica encapsulated gold NP

Synthesis of porous-silica encapsulated gold NP has been reported in our previous communications.<sup>1</sup>

##### Synthesis of palladium nanoclusters

Synthesis of palladium nanoclusters has been reported in our previous communications.<sup>2</sup>

##### Synthesis of porous-silica encapsulated palladium NPs

The Pd nanocluster solution (10 mL) was mixed with a 1:4 water/ethanol mixture (200 mL). 0.1M NaOH solution (0.9 mL) and tetraethyl orthosilicate (300  $\mu$ L, Aldrich, 98%) were added to this mixture and stirred at RT for 3 d. Silica-encapsulated palladium nanoclusters were separated from the reaction medium by centrifugation at 14000 rpm and redispersion in water several times. Silica-encapsulated Pd nanoclusters were dried at 100 °C and calcined at 550 °C under air at a ramp of 0.8 min<sup>-1</sup>.

## Details of calculations of CO (mole) conversion per Pd (mole) per second by the four catalysts

### Calculation of CO amount passing through reactor per second

The flow rate of the reaction gas mixture is  $25 \text{ mL min}^{-1}$  (1:5:15.7, CO:O<sub>2</sub>:N<sub>2</sub>).

Amount of CO in 25 mL gas mixture is =1.15 mL.

Temperature of the gas is =  $28^\circ\text{C} = 301\text{K}$ .

Volume of CO at STP =  $1.15 \times 273/301 = 1.043 \text{ mL}$ .

At STP volume of 1 mole CO is  $22.4 \times 10^3 \text{ mL}$

Then at STP  $1.043 \text{ mL}$  of CO =  $0.046 \times 10^{-3}$  mole CO.

Then amount of CO gas passing through reactor per minute is  $0.046 \times 10^{-3}$  mole.

Then amount of CO gas passing through reactor per second  $7.76 \times 10^{-7}$  mole.

Then 100 % CO conversion =  $7.76 \times 10^{-7}$  mole CO conversion per second.

### Catalyst Au<sub>3</sub>Pd@SiO<sub>2</sub>

Amount of catalyst taken for CO oxidation = 17 mg

Loading of Pd based on ICP-AES = 1.1 %

Amount of Pd in 17 mg catalyst =  $1.757 \times 10^{-6}$  mole

| Temperature (°C) | CO conversion (%) | CO(mole) conversion s <sup>-1</sup> | CO(mole) conversion s <sup>-1</sup> Pd (mole) <sup>-1</sup> |
|------------------|-------------------|-------------------------------------|-------------------------------------------------------------|
| 100              | 0                 | 0                                   | 0                                                           |
| 180              | 4                 | $31.04 \times 10^{-9}$              | $1.76 \times 10^{-2}$                                       |
| 190              | 7                 | $54.32 \times 10^{-9}$              | $3.08 \times 10^{-2}$                                       |
| 200              | 100               | $7.76 \times 10^{-7}$               | 0.44                                                        |

### Catalyst AuPd@SiO<sub>2</sub>

Amount of catalyst taken for CO oxidation = 17 mg

Loading of Pd based on ICP-AES = 1.6 %

Amount of Pd in 17 mg catalyst =  $2.55 \times 10^{-6}$  mole

| Temperature (°C) | CO conversion (%) | CO(mole) conversion s <sup>-1</sup> | CO(mole) conversion s <sup>-1</sup> Pd (mole) <sup>-1</sup> |
|------------------|-------------------|-------------------------------------|-------------------------------------------------------------|
| 100              | 0                 | 0                                   | 0                                                           |
| 120              | 9                 | $69.84 \times 10^{-9}$              | $2.74 \times 10^{-2}$                                       |
| 135              | 50                | $3.88 \times 10^{-7}$               | $15.2 \times 10^{-2}$                                       |
| 140              | 100               | $7.76 \times 10^{-7}$               | 0.30                                                        |

### Catalyst AuPd<sub>10</sub>@SiO<sub>2</sub>

Amount of catalyst taken for CO oxidation = 17 mg

Loading of Pd based on ICP-AES = 2.48 %

Amount of Pd in 17 mg catalyst =  $3.956 \times 10^{-6}$  mole

| Temperature (°C) | CO conversion (%) | CO(mole) conversion s <sup>-1</sup> | CO(mole) conversion s <sup>-1</sup> Pd (mole) <sup>-1</sup> |
|------------------|-------------------|-------------------------------------|-------------------------------------------------------------|
| 100              | 0                 | 0                                   | 0                                                           |
| 150              | 5                 | $38.8 \times 10^{-9}$               | $9.80 \times 10^{-3}$                                       |
| 160              | 19                | $147.44 \times 10^{-9}$             | $37.26 \times 10^{-3}$                                      |
| 170              | 100               | $7.76 \times 10^{-7}$               | 0.19                                                        |

### Catalyst Pd@SiO<sub>2</sub>

Amount of catalyst taken for CO oxidation = 17 mg

Loading of Pd based on ICP-AES = 2.62 %

Amount of Pd in 17 mg catalyst =  $4.18 \times 10^{-6}$  mole

| Temperature (°C) | CO conversion (%) | CO(mole) conversion s <sup>-1</sup> | CO(mole) conversion s <sup>-1</sup> Pd (mole) <sup>-1</sup> |
|------------------|-------------------|-------------------------------------|-------------------------------------------------------------|
| 100              | 0                 | 0                                   | 0                                                           |
| 150              | 4                 | $31.04 \times 10^{-9}$              | $7.42 \times 10^{-3}$                                       |
| 160              | 12                | $93.12 \times 10^{-9}$              | $22.27 \times 10^{-3}$                                      |
| 170              | 100               | $7.76 \times 10^{-7}$               | 0.185                                                       |

a)

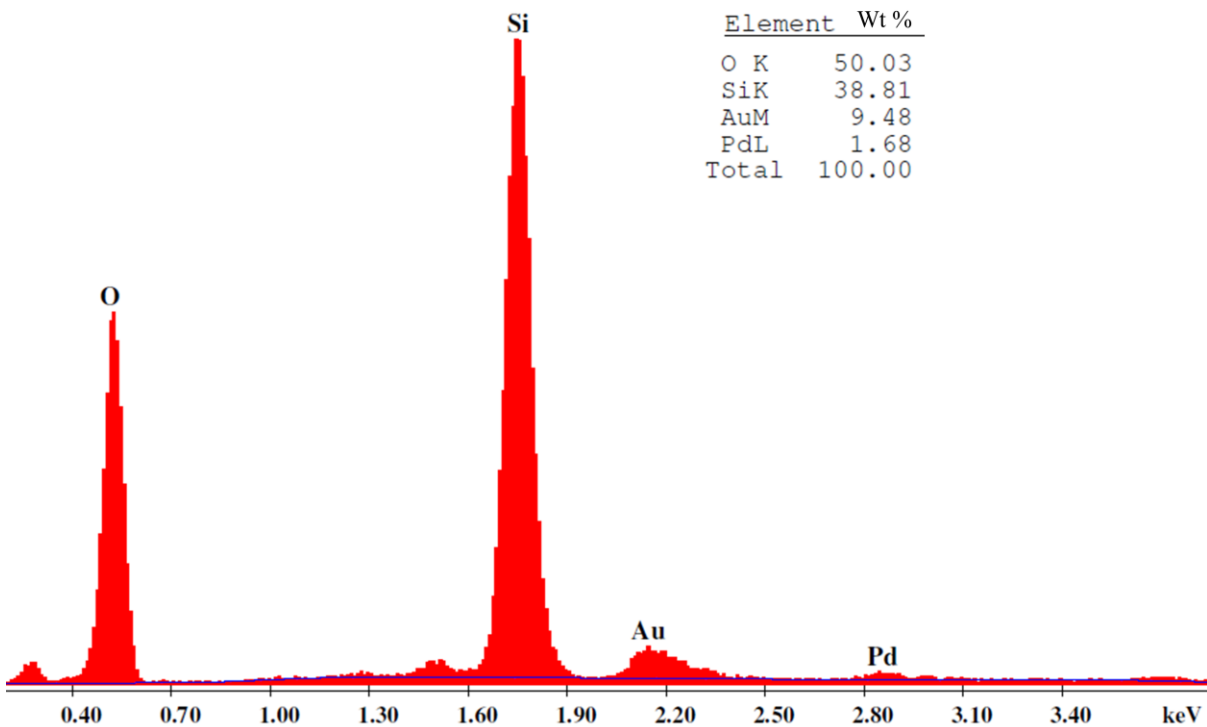

b)

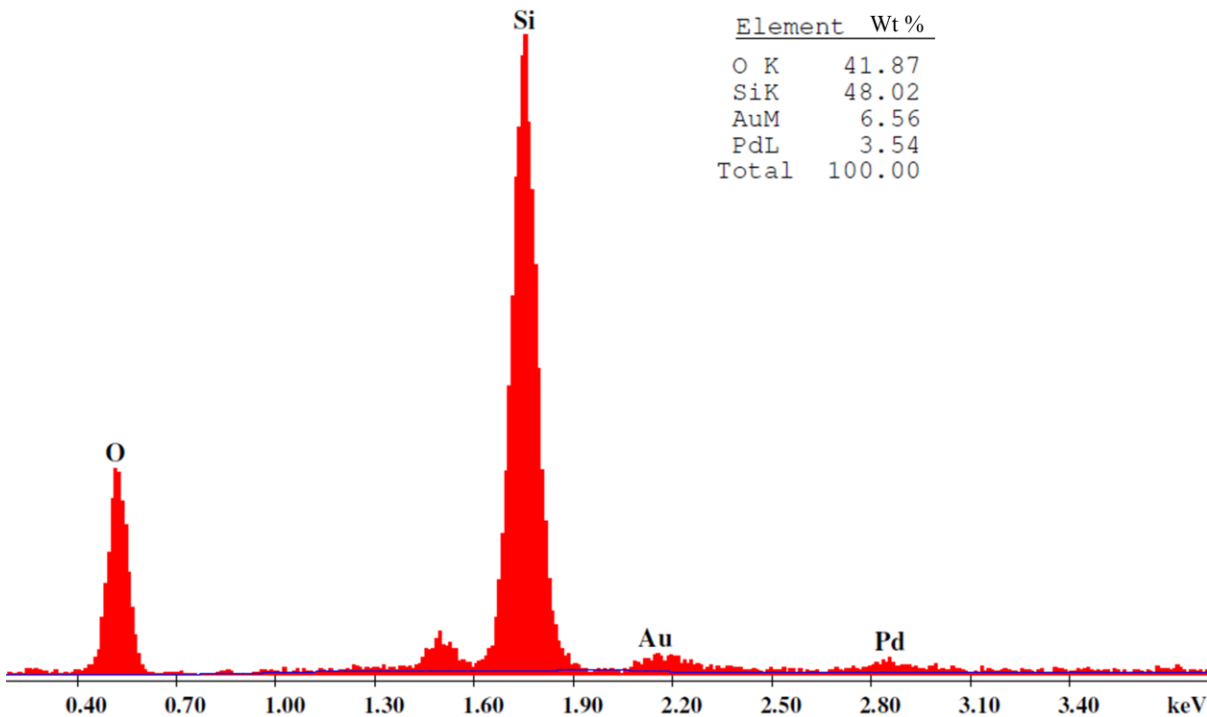

C)

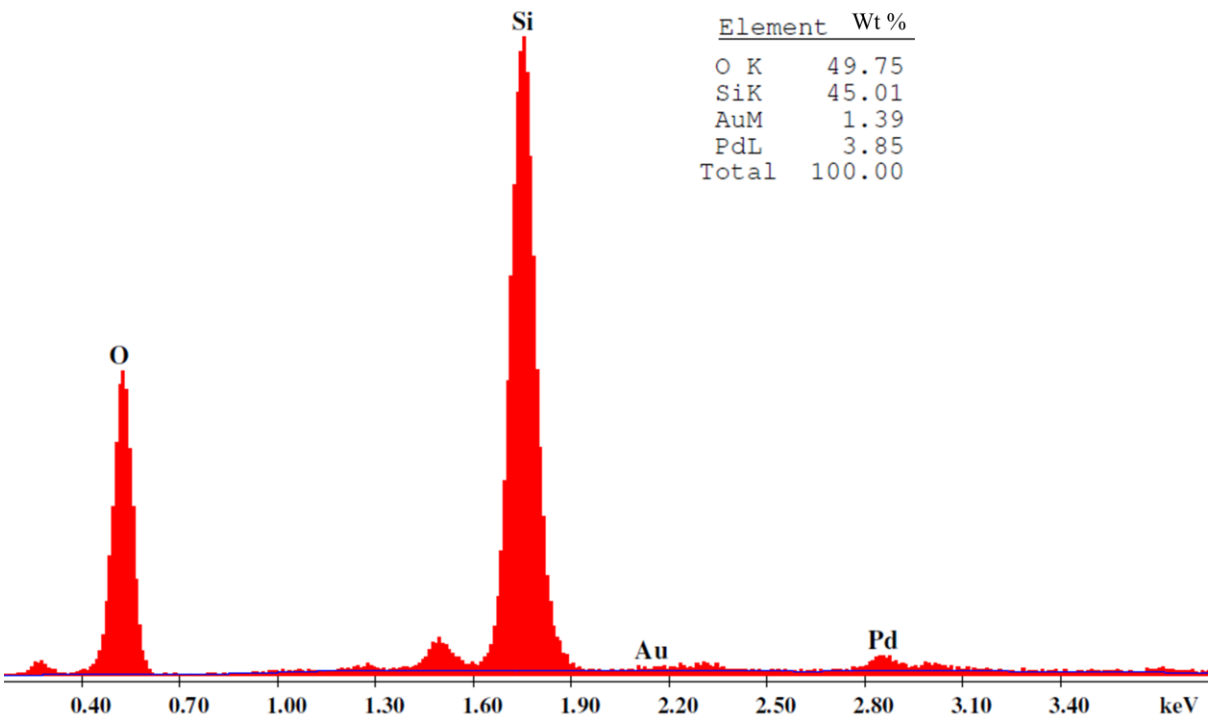

d)

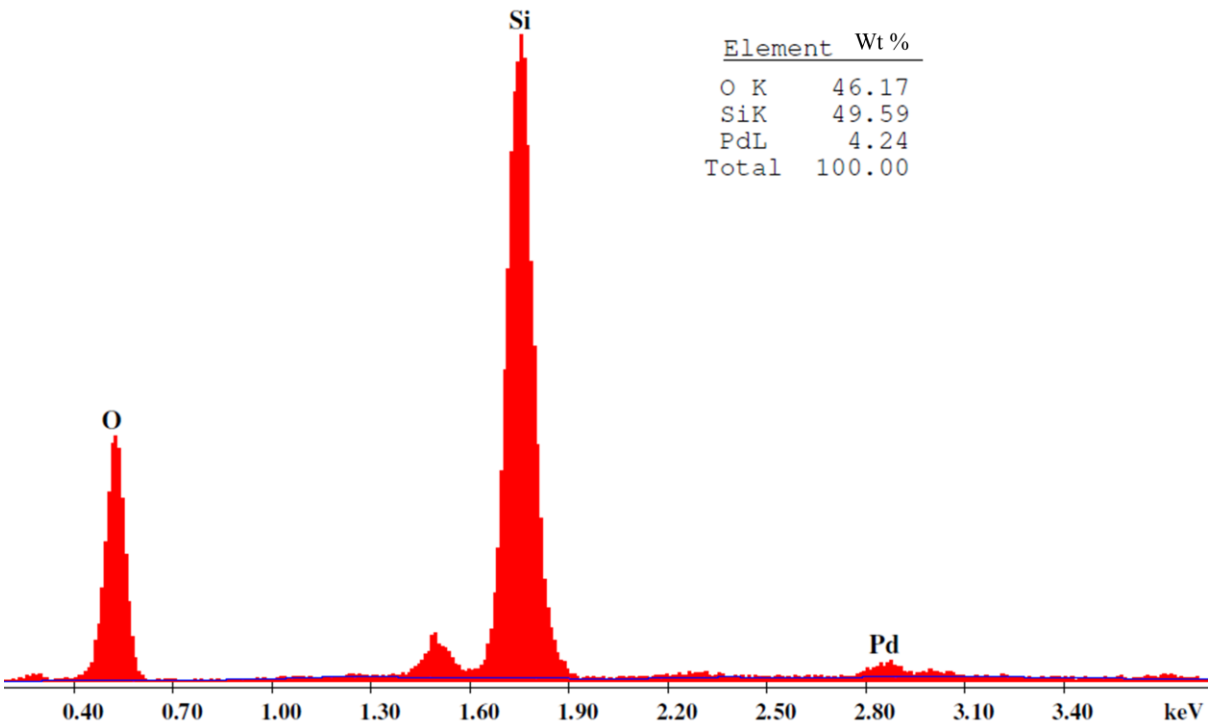

**Supporting Information Figure S1:** EDAX spectra of a) Au<sub>3</sub>Pd@SiO<sub>2</sub>, b) AuPd@SiO<sub>2</sub>, c) AuPd<sub>10</sub>@SiO<sub>2</sub>, d) Pd@SiO<sub>2</sub> and respective microanalysis (insets).

a)

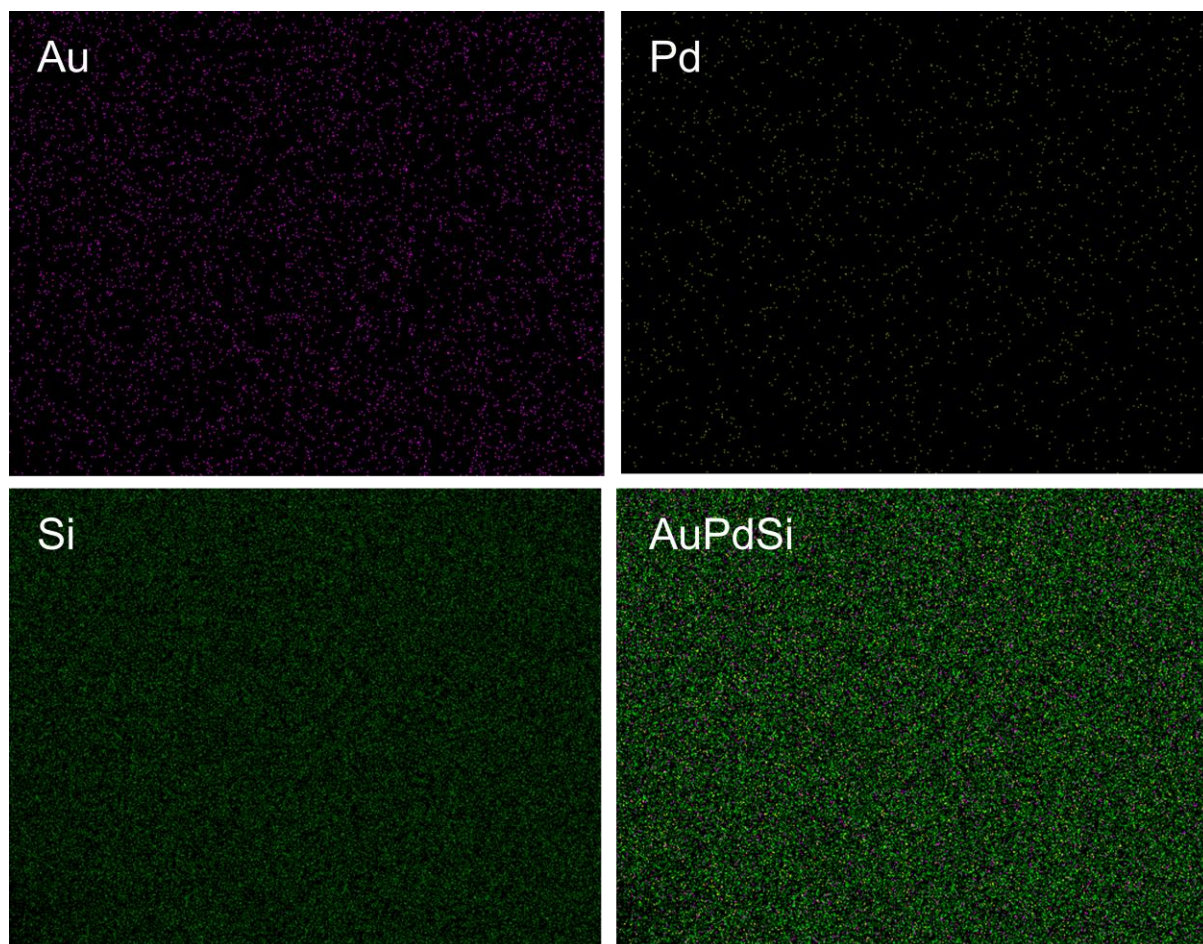

b)

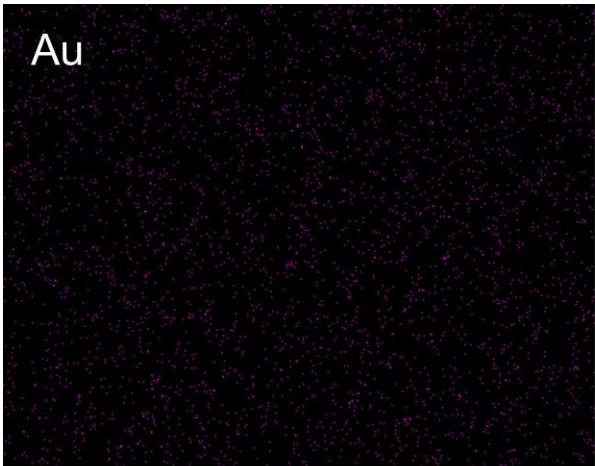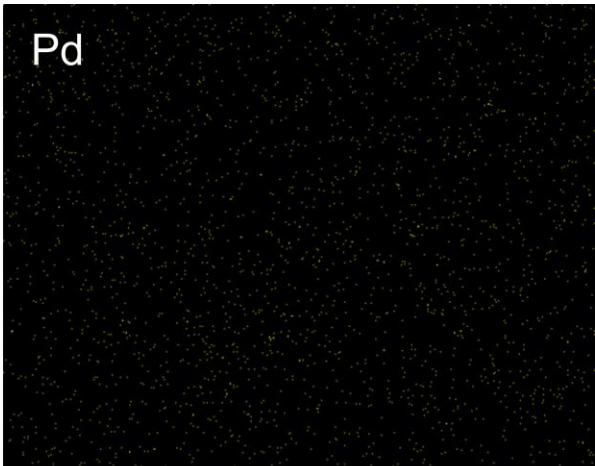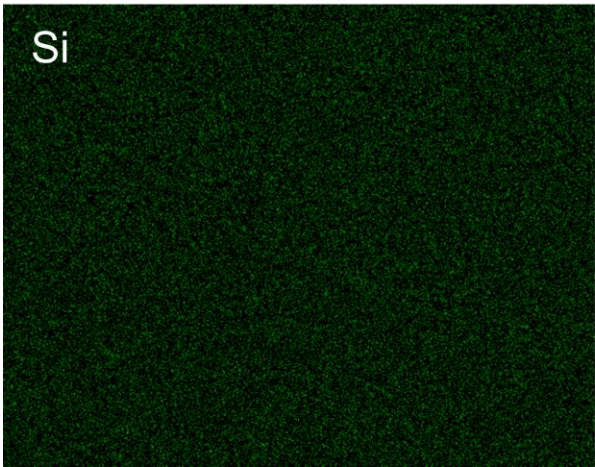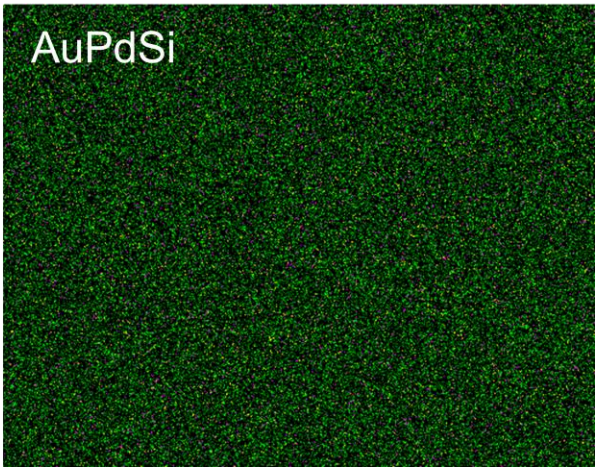

C)

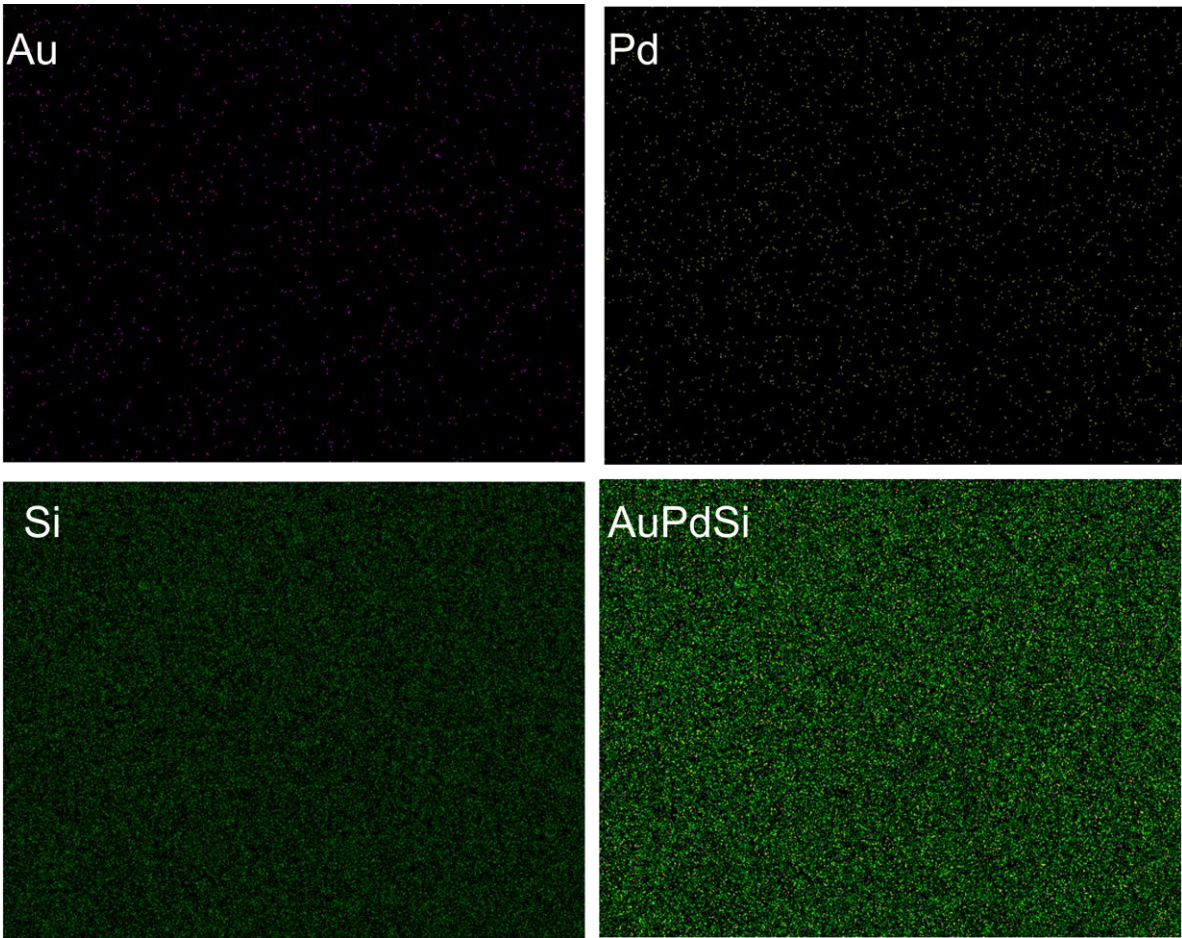

d)

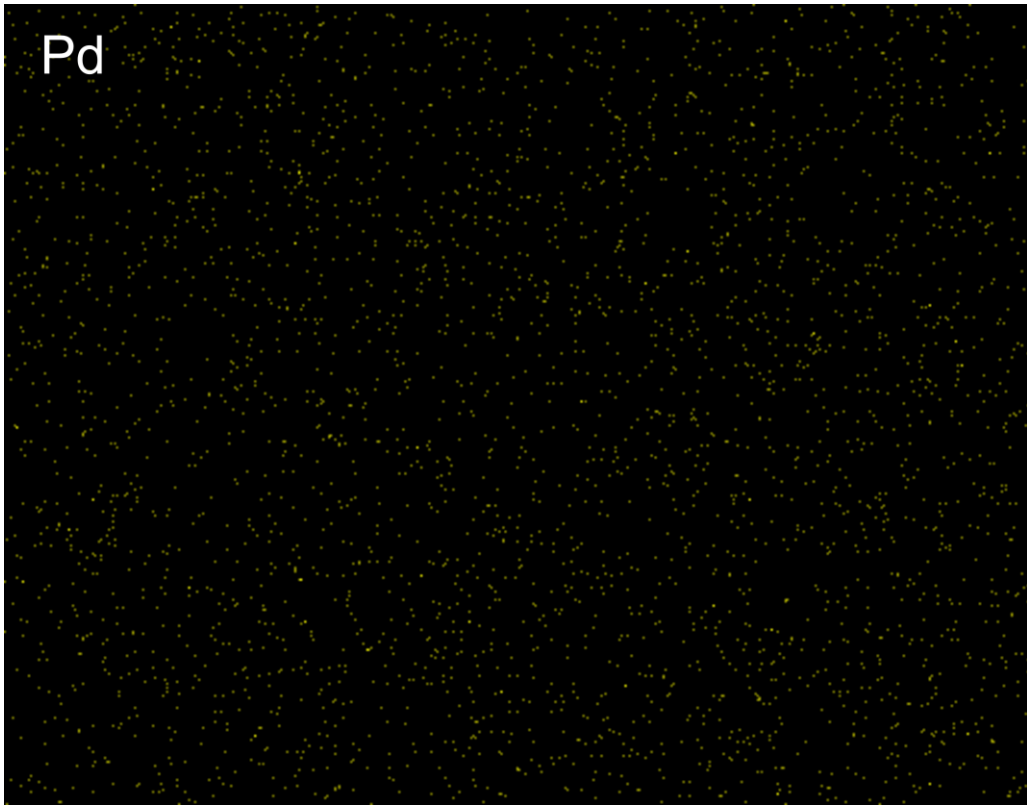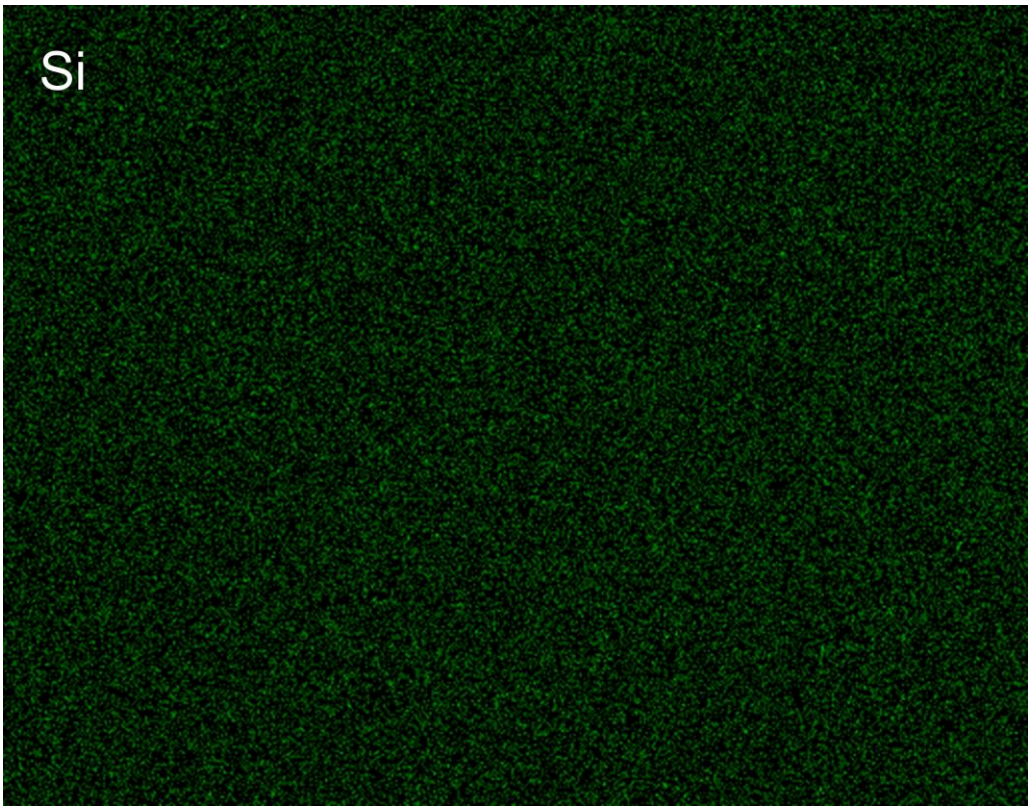

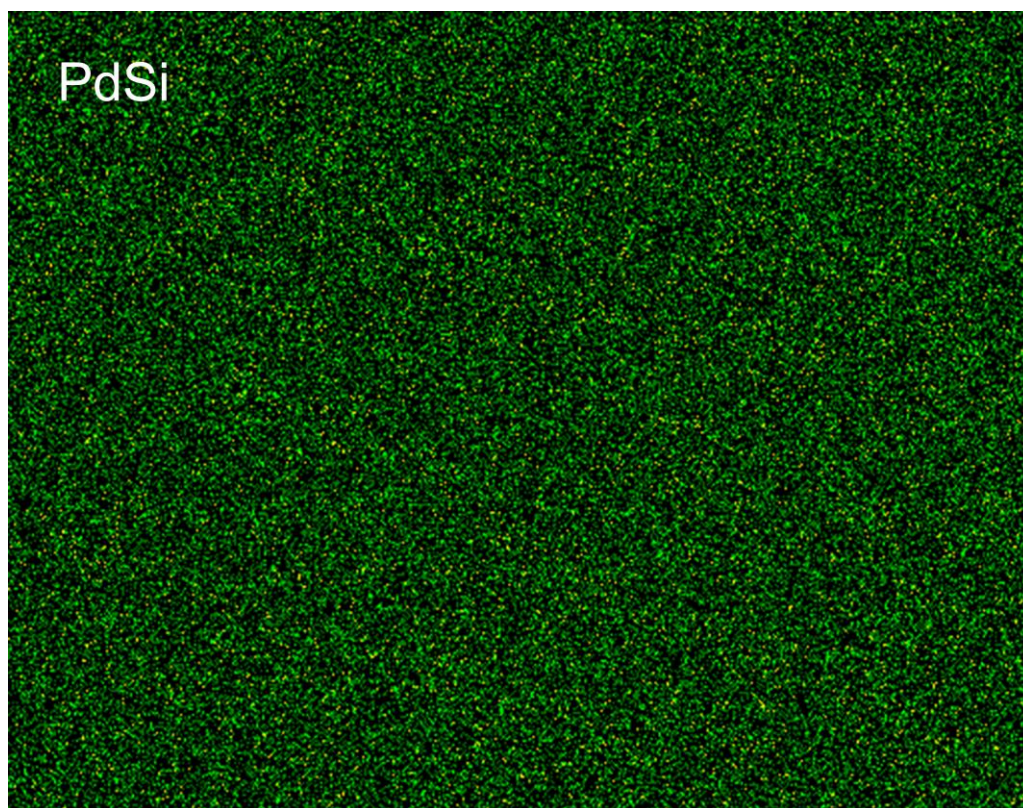

**Supporting Information Figure S2:** SEM elemental mapping analysis of a)  $\text{Au}_3\text{Pd@SiO}_2$ , b)  $\text{AuPd@SiO}_2$ , c)  $\text{AuPd}_{10}\text{@SiO}_2$  and d)  $\text{Pd@SiO}_2$

a)

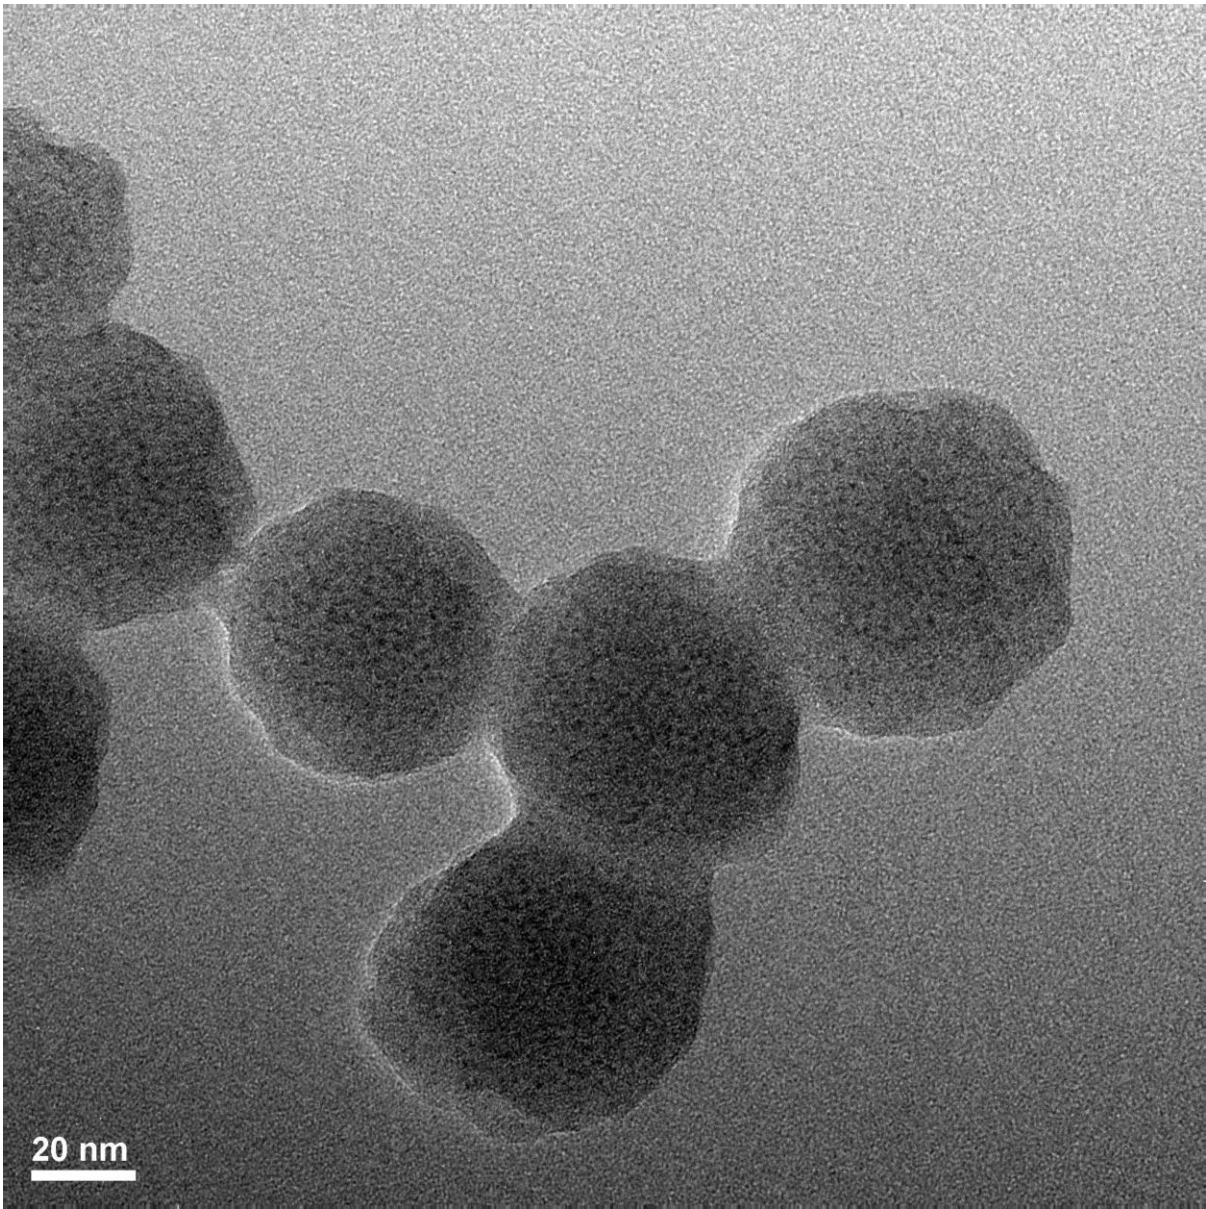

b)

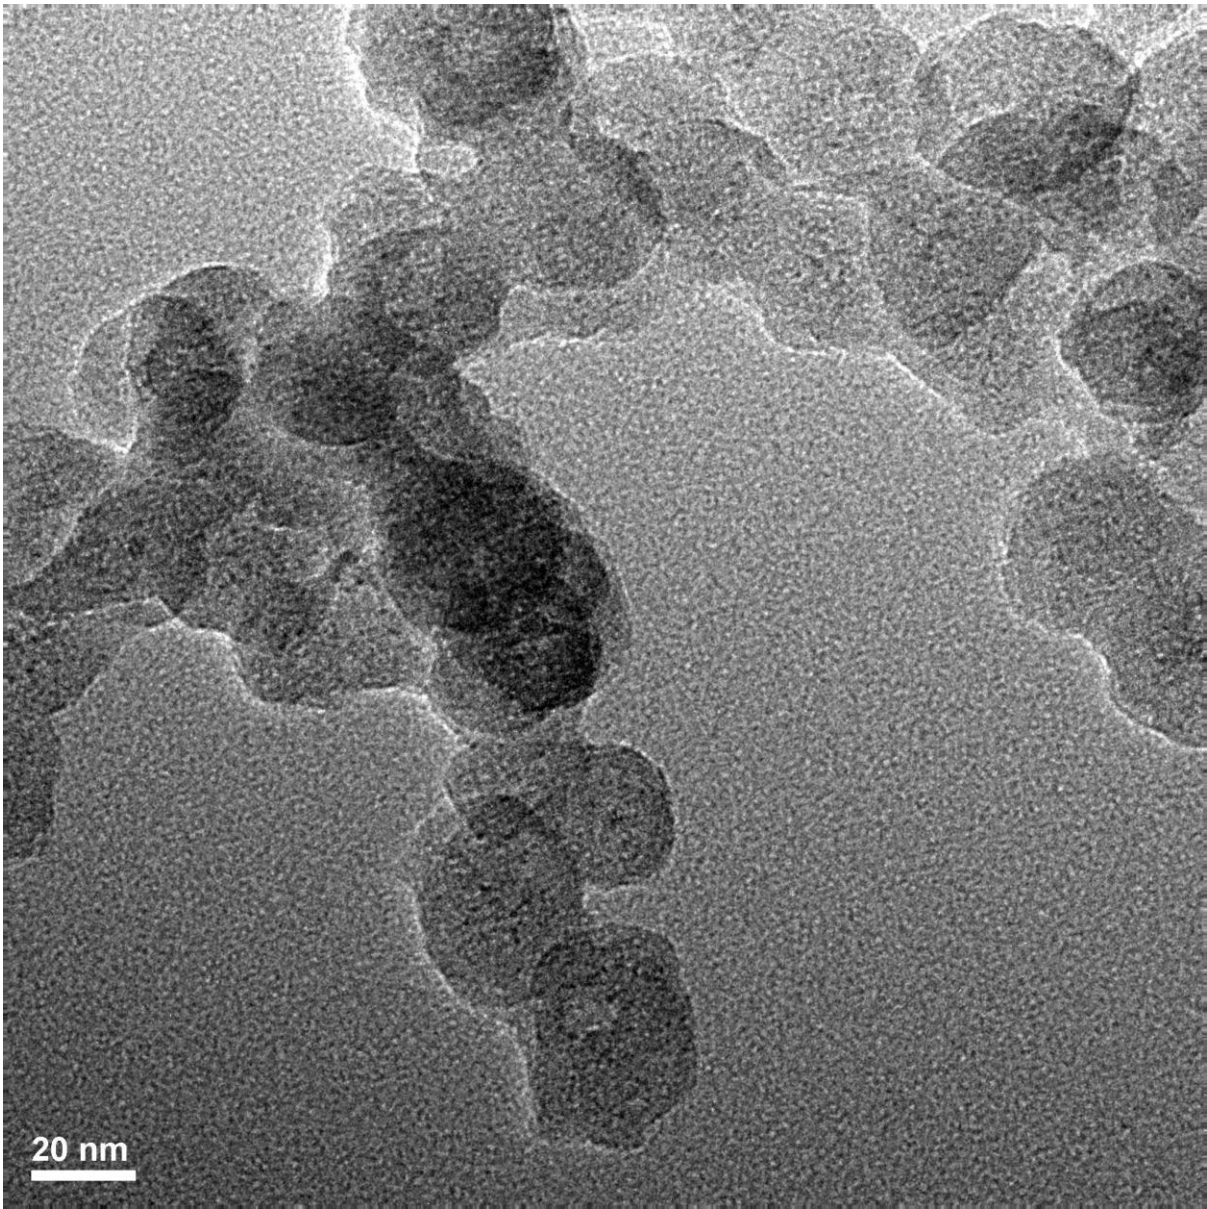

C)

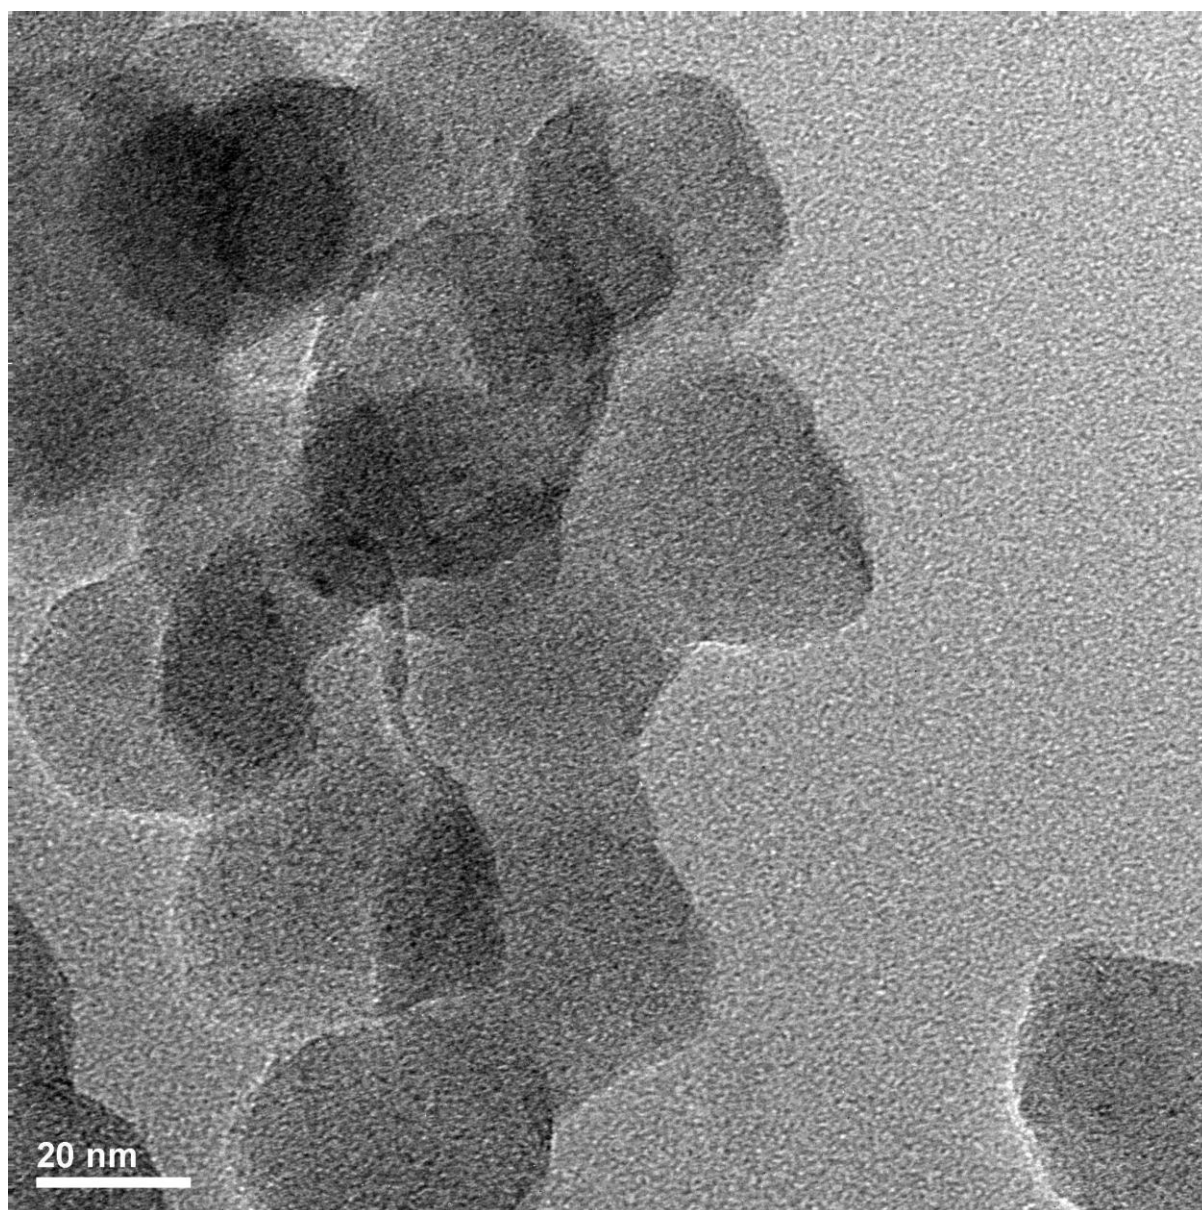

**Supporting Information Figure S3:** HRTEM images of as-synthesized a) Au<sub>3</sub>Pd@SiO<sub>2</sub>, b) AuPd@SiO<sub>2</sub> and C) AuPd<sub>10</sub>@SiO<sub>2</sub>

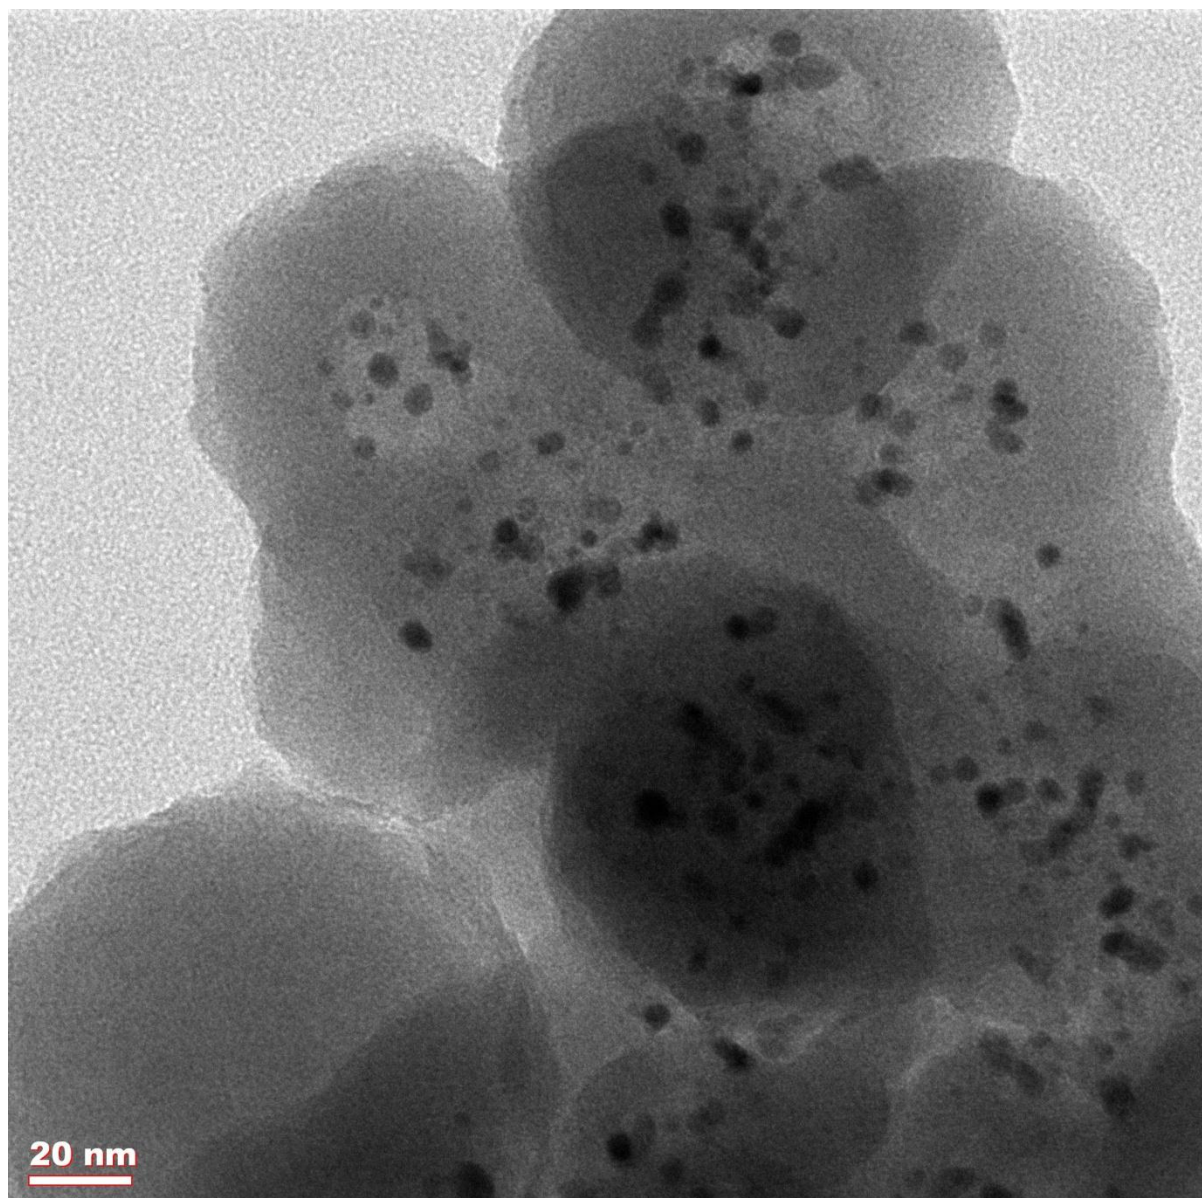

**Supporting Information Figure S4:** TEM image of silica encapsulated gold nanoparticles. A Gatan digital camera (Orius SC 600 A, Gatan, 1024 x 1024 pixels) at 1000 –1000000 x magnification was used to record the micrographs. Sample synthesized by an excess of TEOS. 1 mL of 0.1 M NaOH and 200  $\mu$ L of TEOS were used for 5 mL of Au cluster solution. The product was filtered, dried and calcined at 500  $^{\circ}$ C.

a)

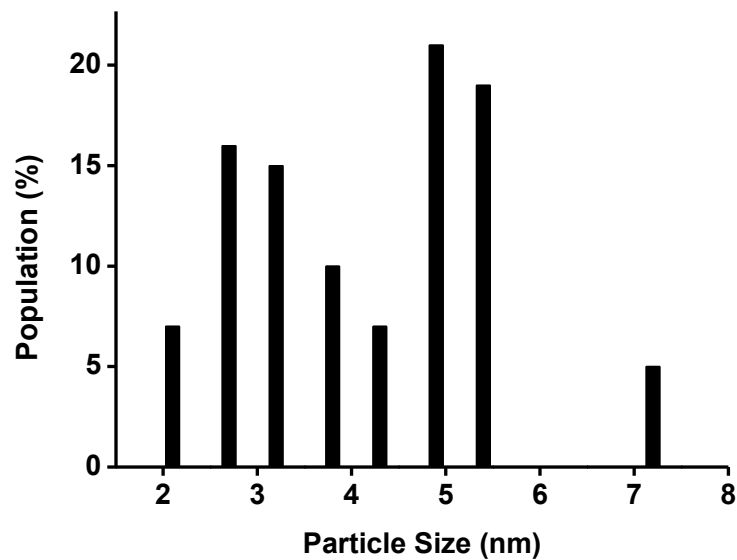

b)

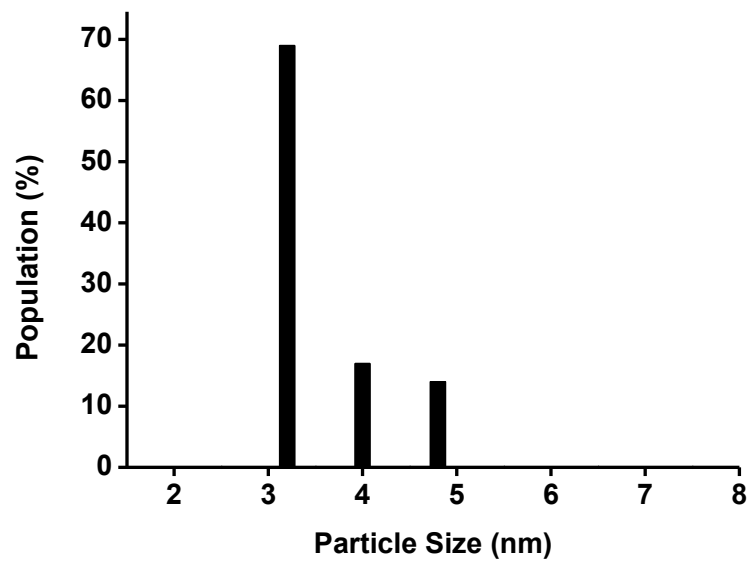

C)

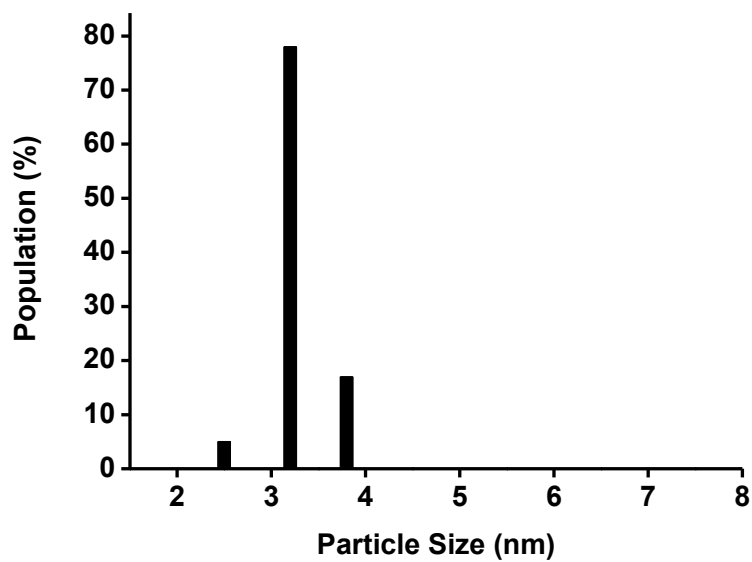

**Supporting Information Figure S5:** Particle size distribution graph of a) Au<sub>3</sub>Pd@SiO<sub>2</sub>, b) AuPd@SiO<sub>2</sub> and C) AuPd<sub>10</sub>@SiO<sub>2</sub> calcined at 550 °C.

a)

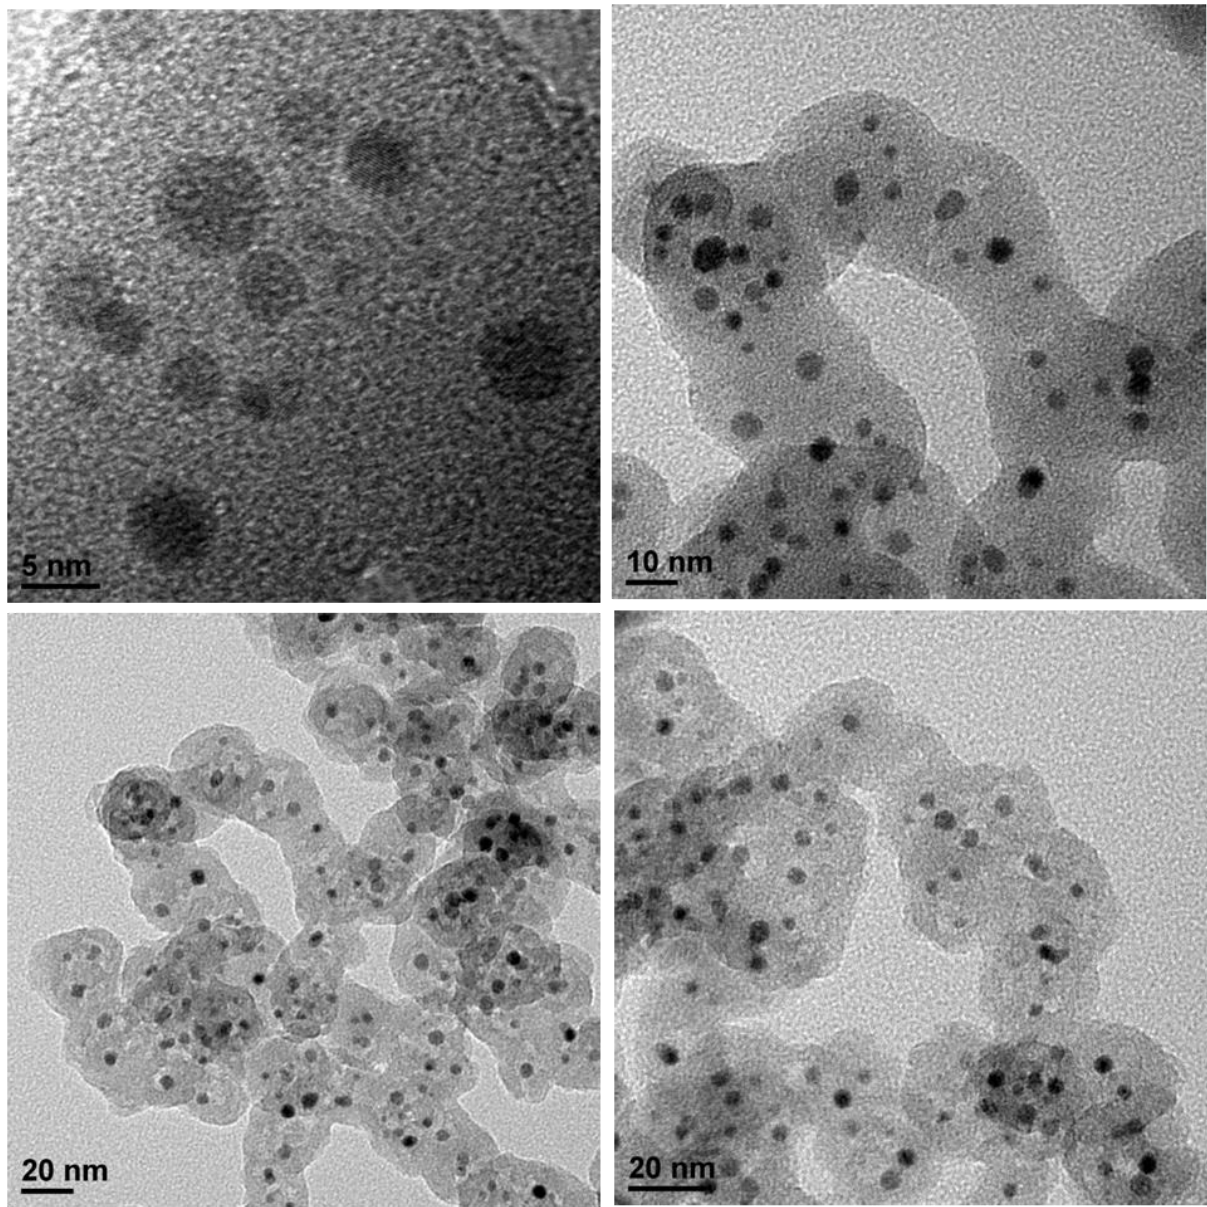

b)

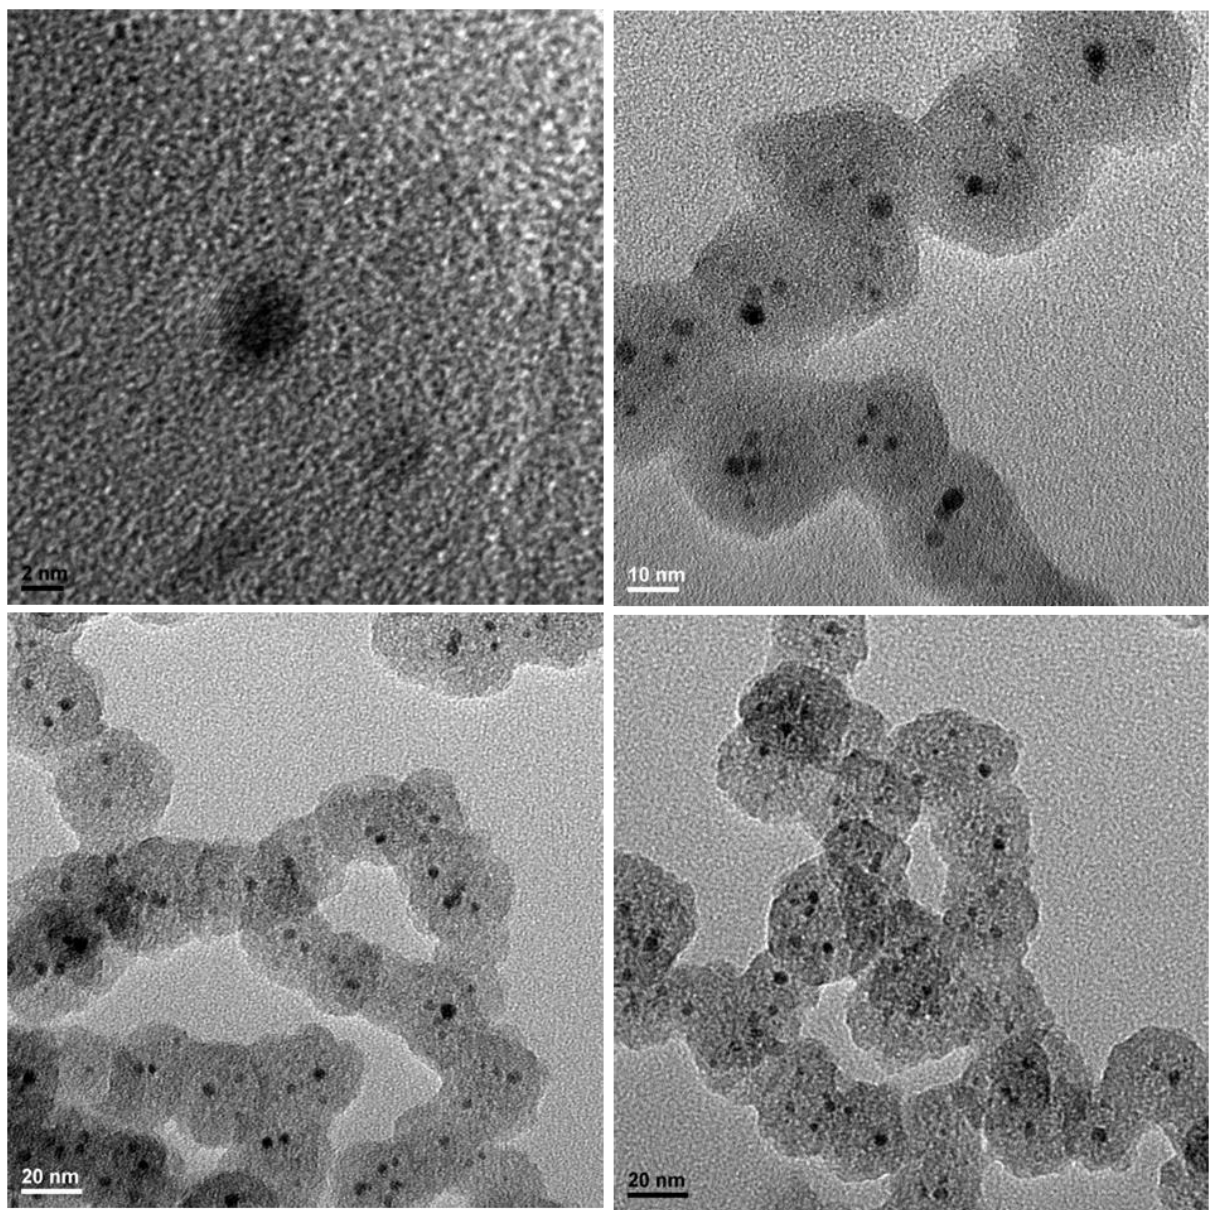

C)

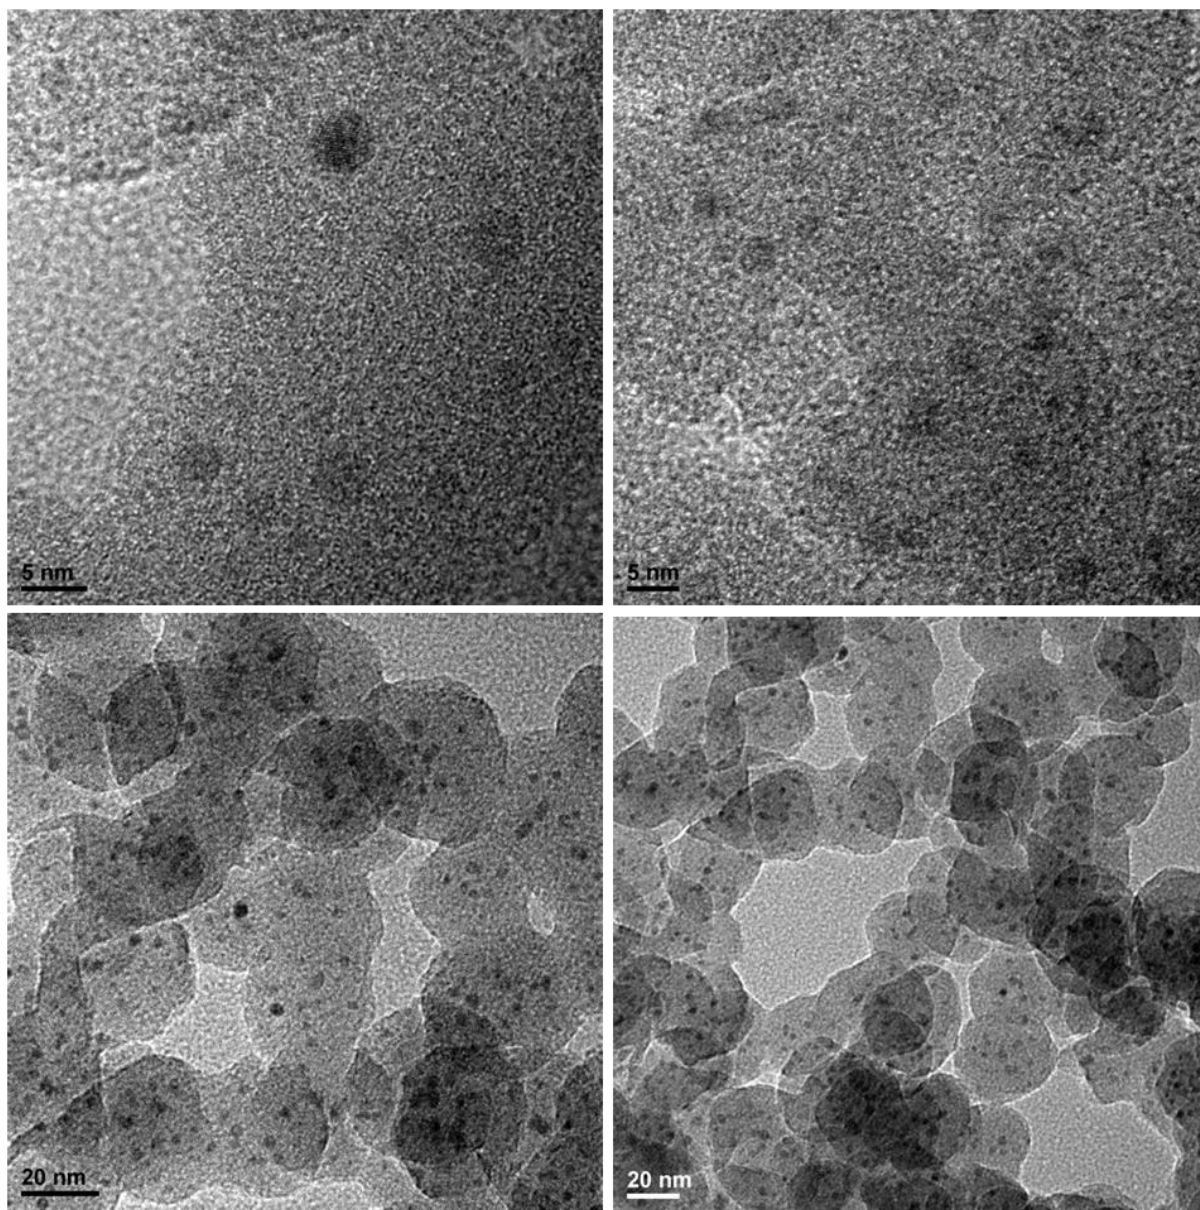

**Supporting Information Figure S6:** HRTEM images of a)  $\text{Au}_3\text{Pd@SiO}_2$ , b)  $\text{AuPd@SiO}_2$ , and C)  $\text{AuPd}_{10}$ , used for determining average particle size distribution. A Gatan digital camera (US 1000, Gatan2048 x 2048 pixels) at 51 – 1000000 x magnification was used to record micrographs.

a)

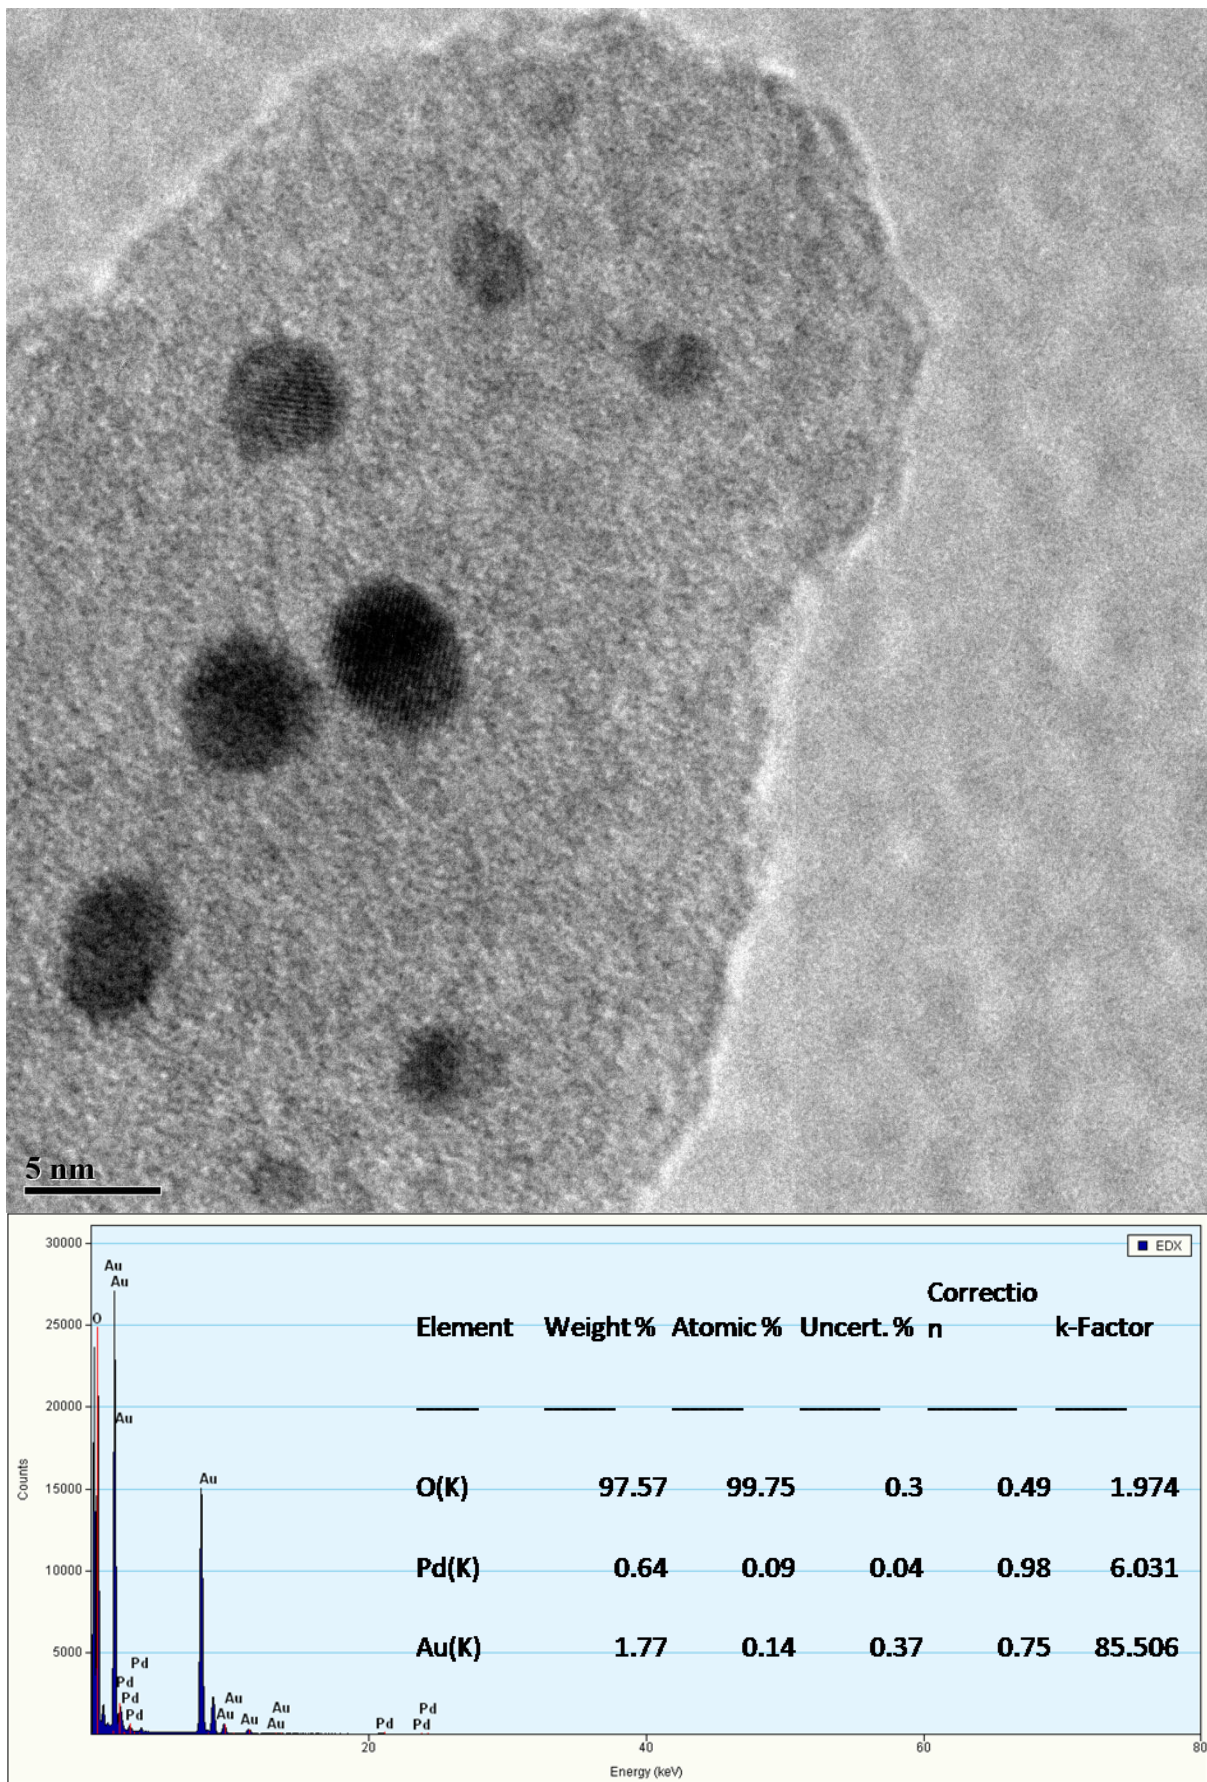

b)

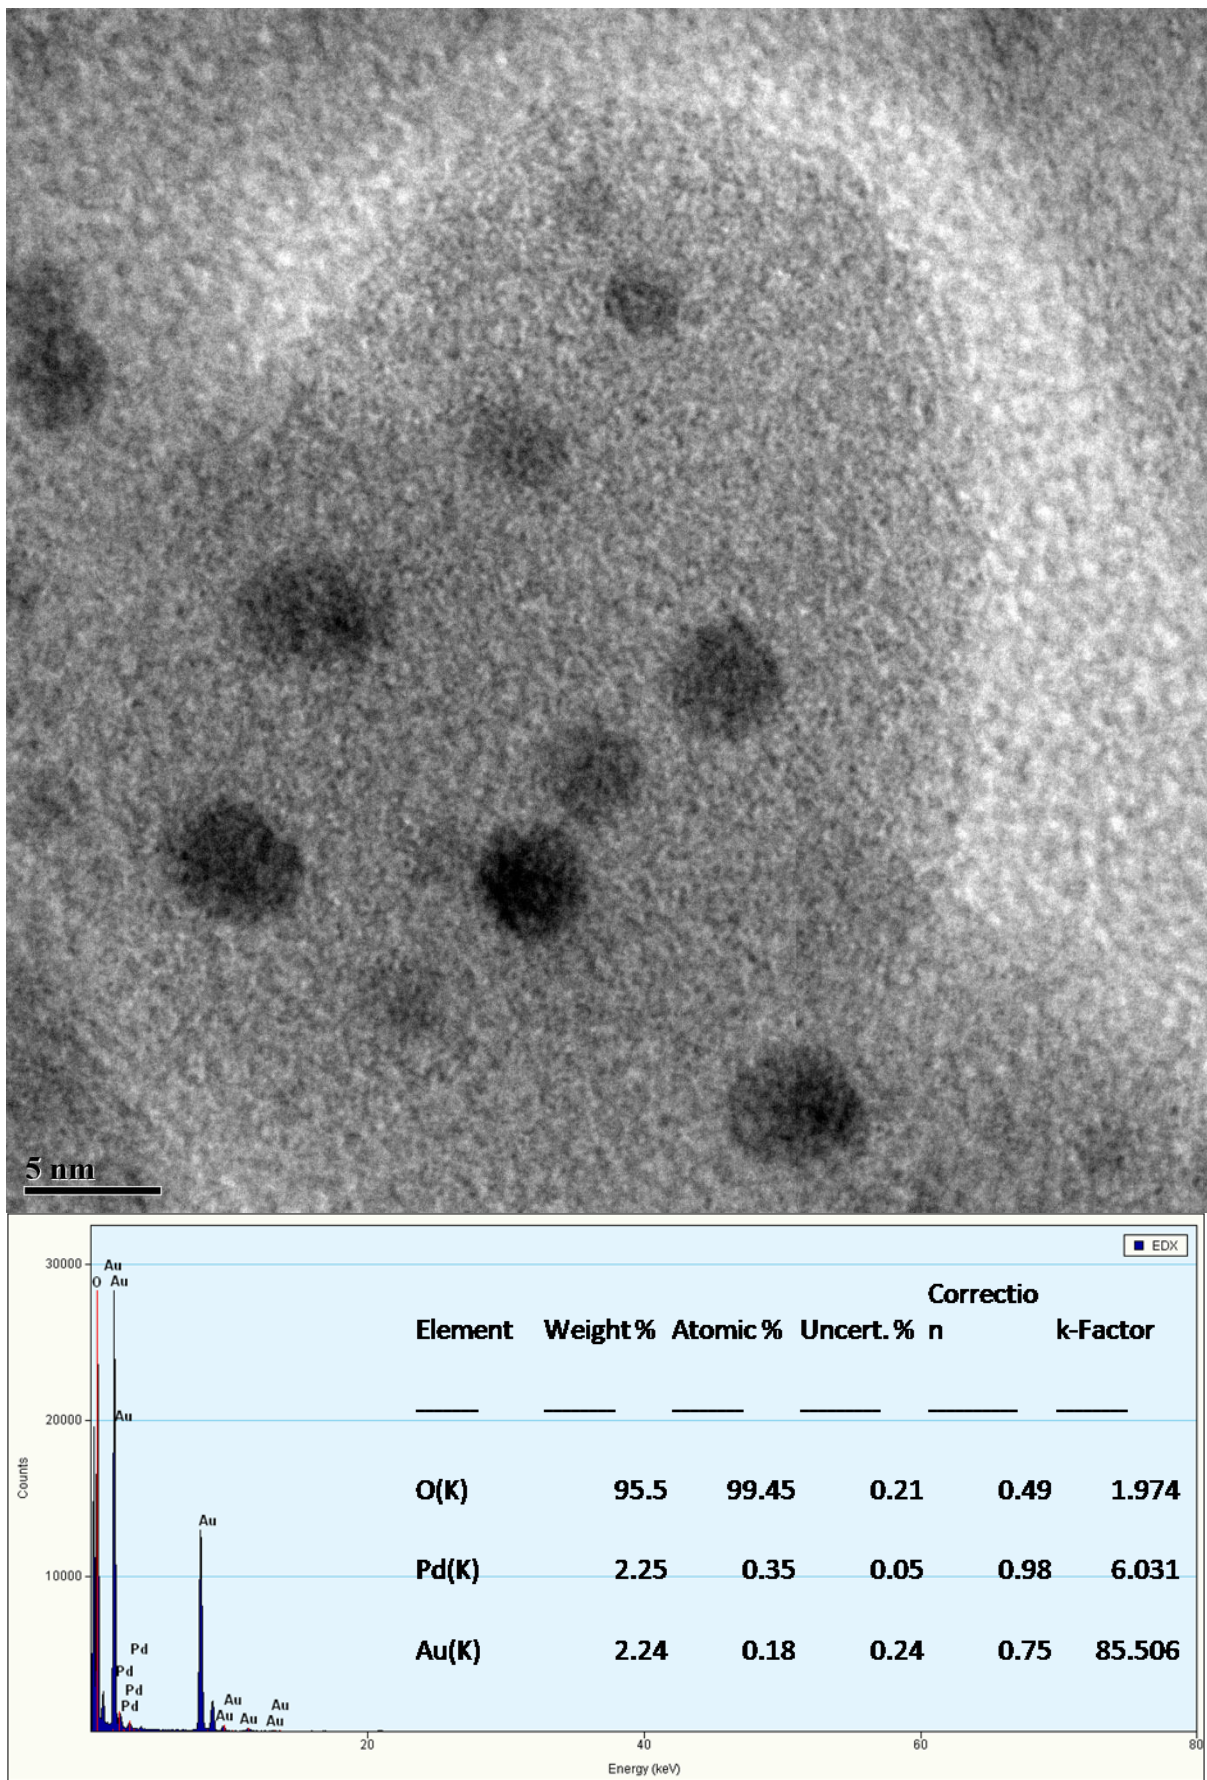

C)

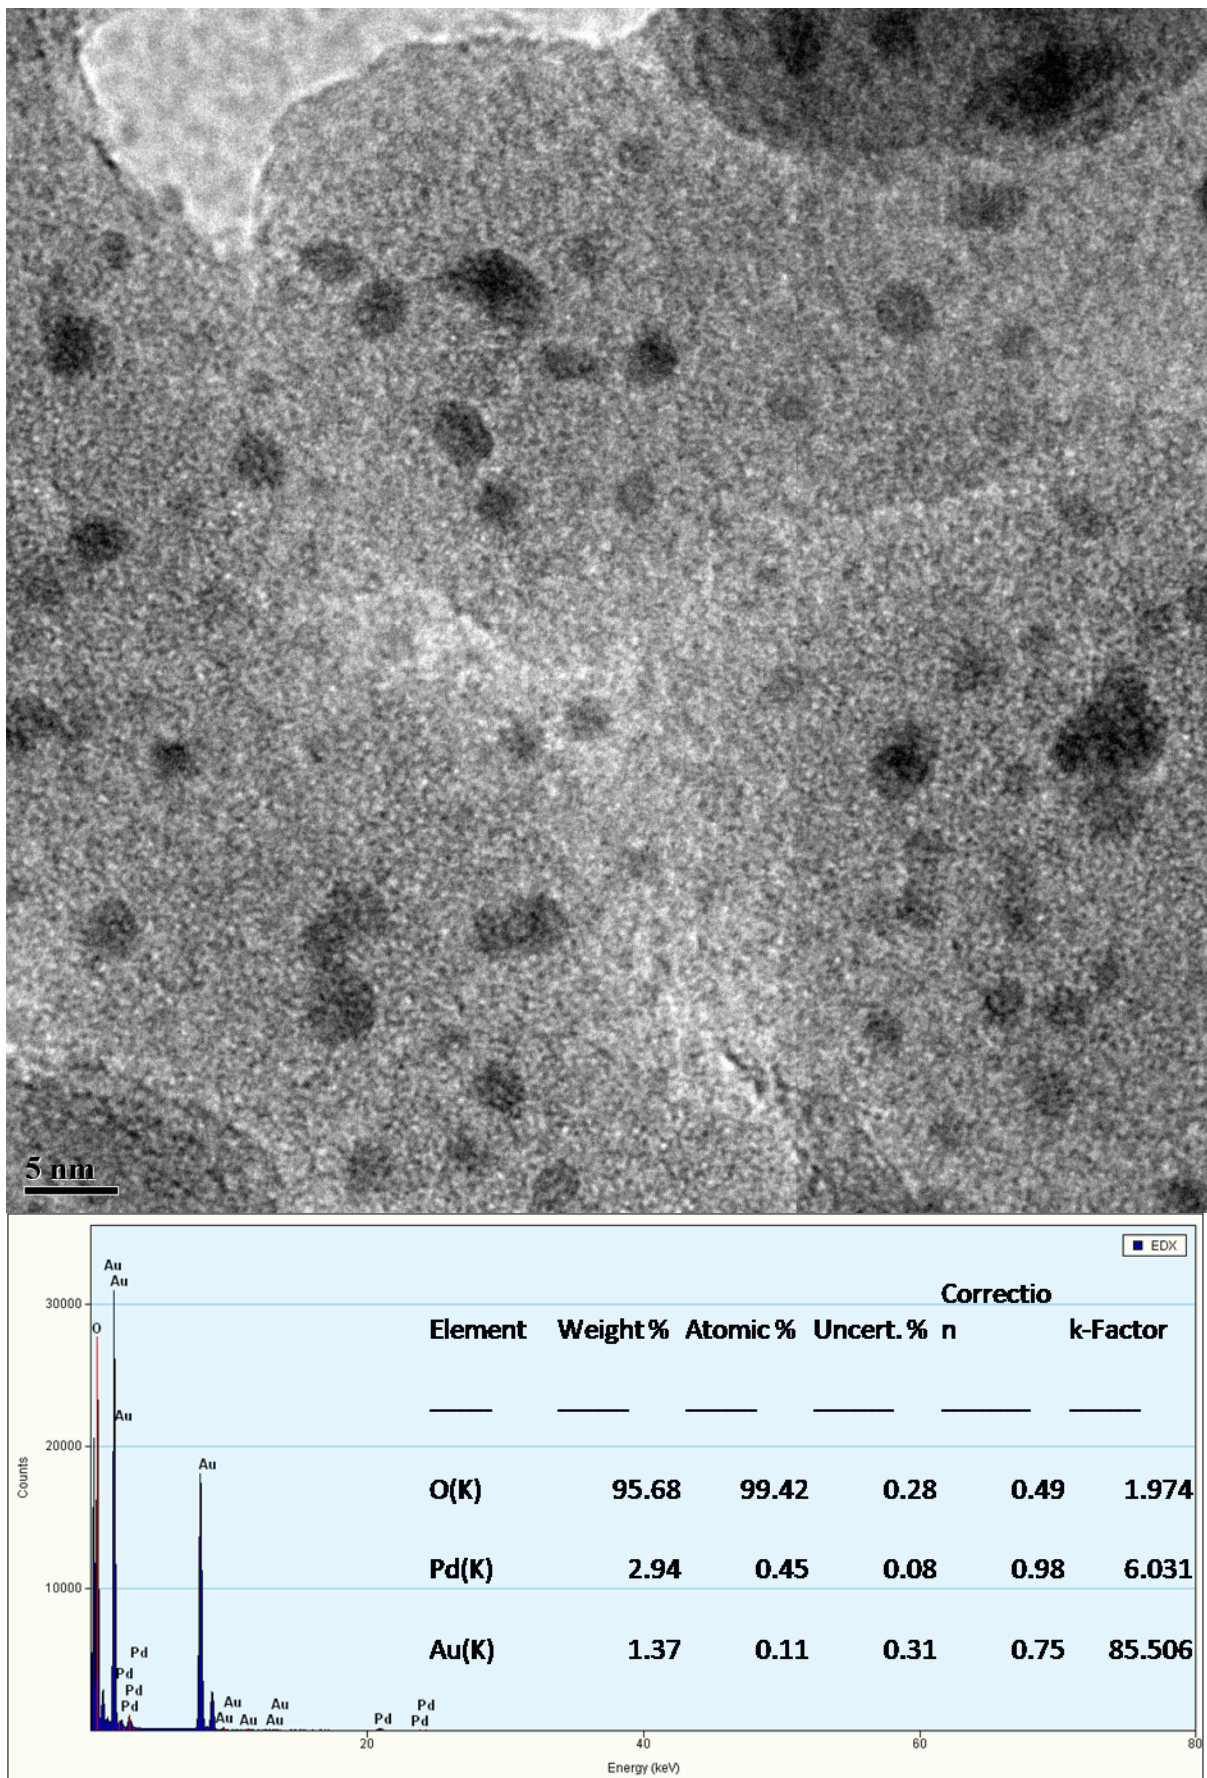

**Supporting Information Figure S7:** Selected area TEM-EDX analysis of a) Au<sub>3</sub>Pd@SiO<sub>2</sub>, b) AuPd@SiO<sub>2</sub> and c) AuPd<sub>10</sub>@SiO<sub>2</sub> and respective microanalysis (below).

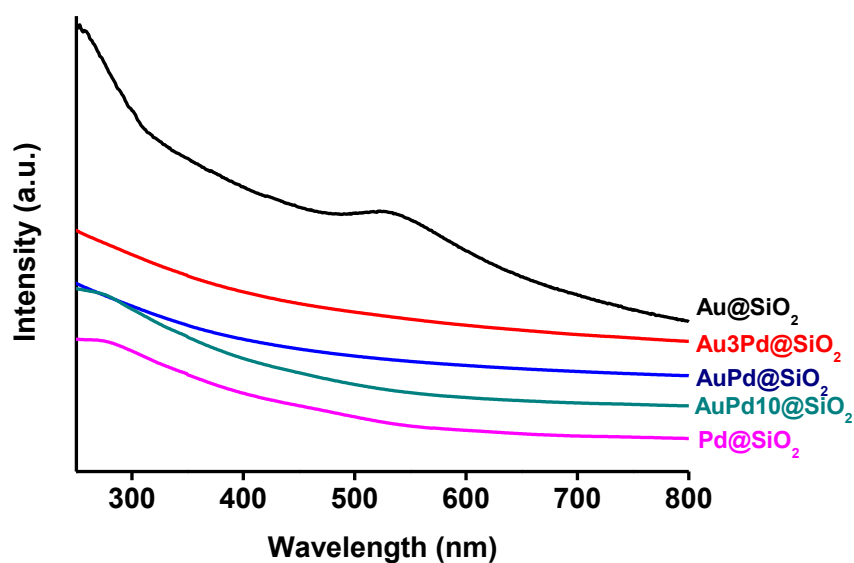

**Supporting Information Figure S8:** UV-visible spectra of Au@SiO<sub>2</sub>, Au<sub>3</sub>Pd@SiO<sub>2</sub>, AuPd@SiO<sub>2</sub>, AuPd<sub>10</sub>@SiO<sub>2</sub> and Pd@SiO<sub>2</sub>.

a)

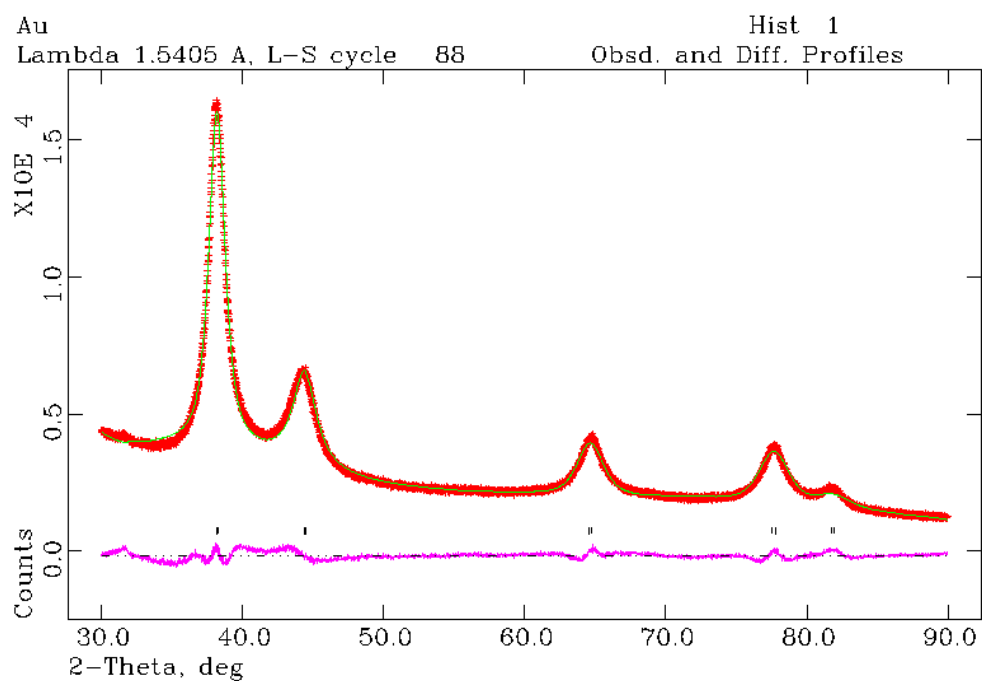

b)

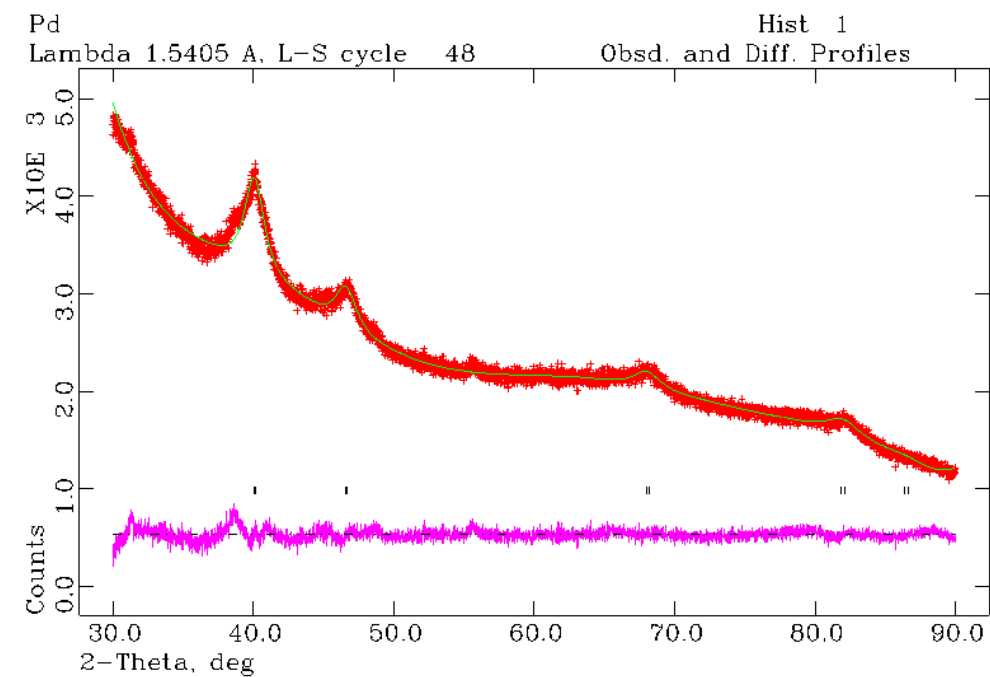

C)

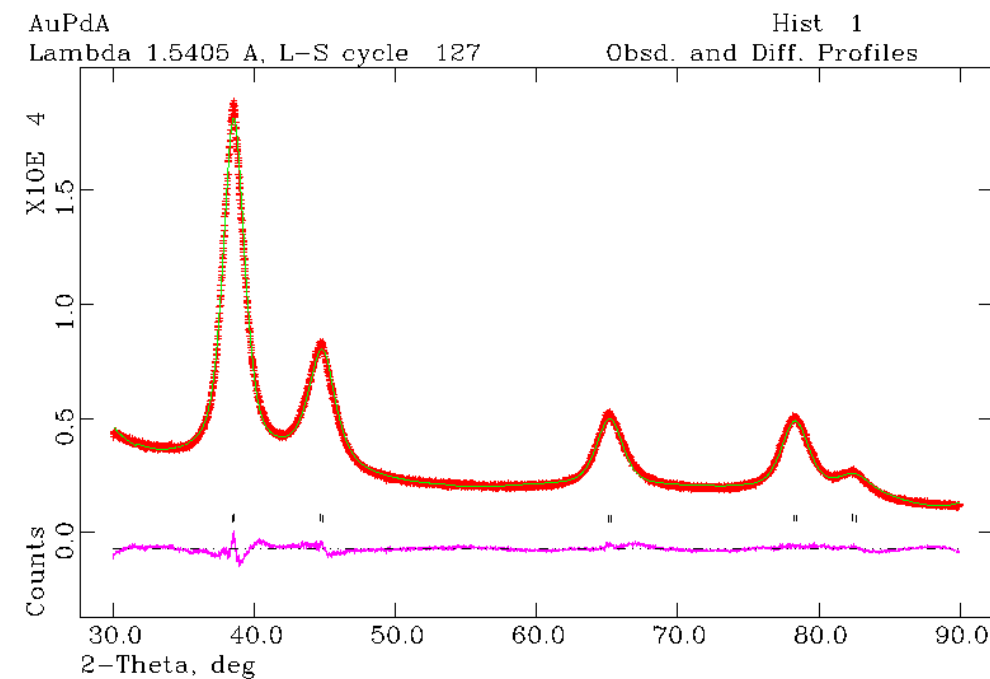

d)

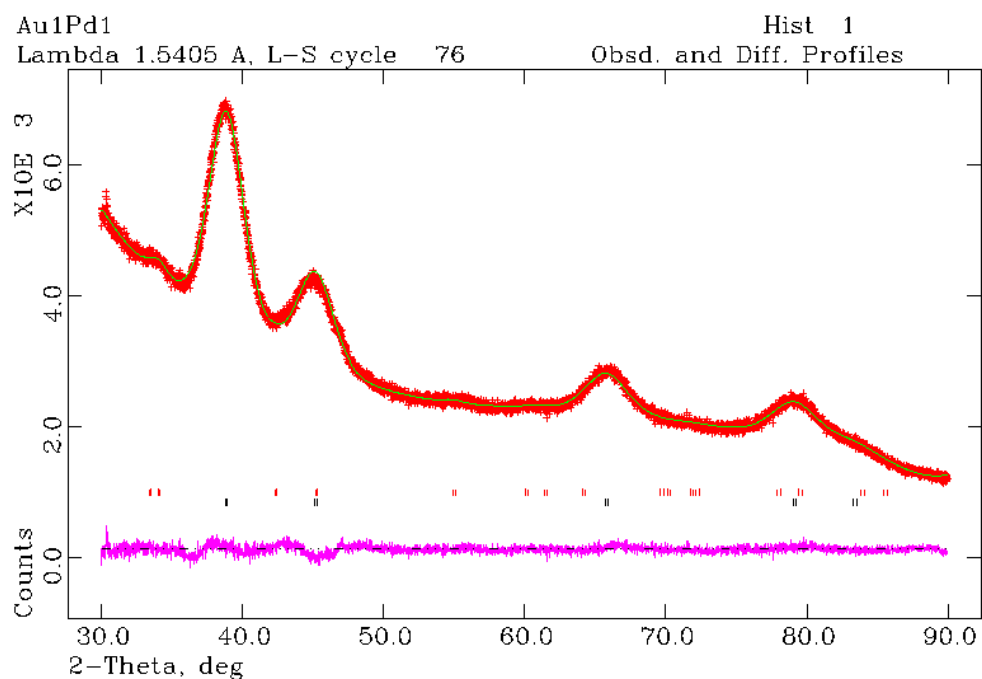

e)

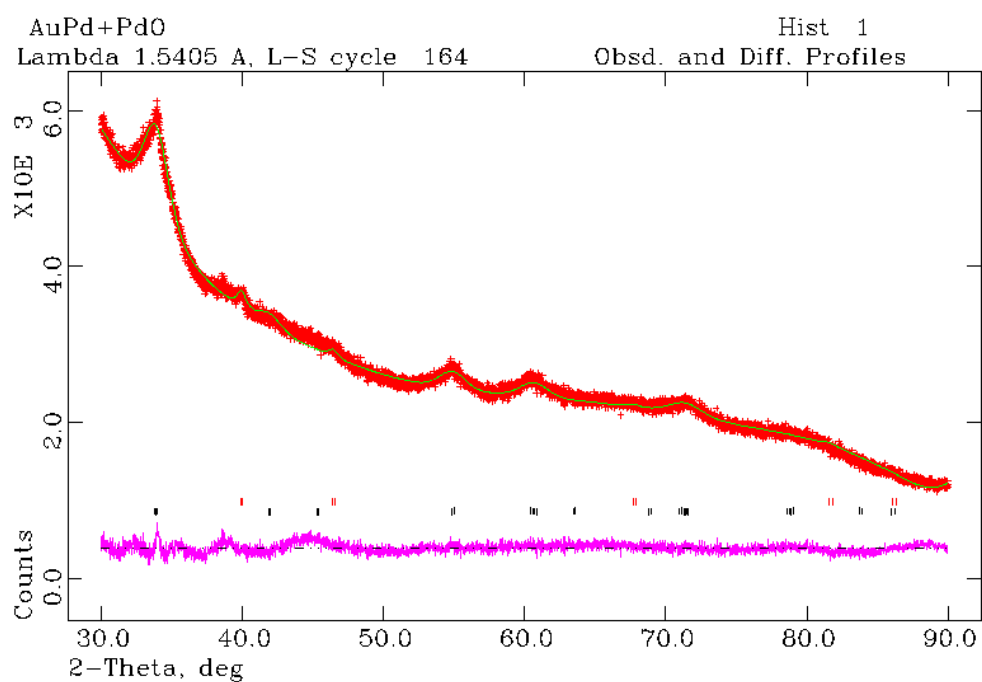

**Supporting Information Figure S9:** Rietveld refinement of a) Au@SiO<sub>2</sub>, b) Pd@SiO<sub>2</sub>, (reduced) c) Au<sub>3</sub>Pd@SiO<sub>2</sub>, d) AuPd@SiO<sub>2</sub>, and e) AuPd<sub>10</sub>@SiO<sub>2</sub>.

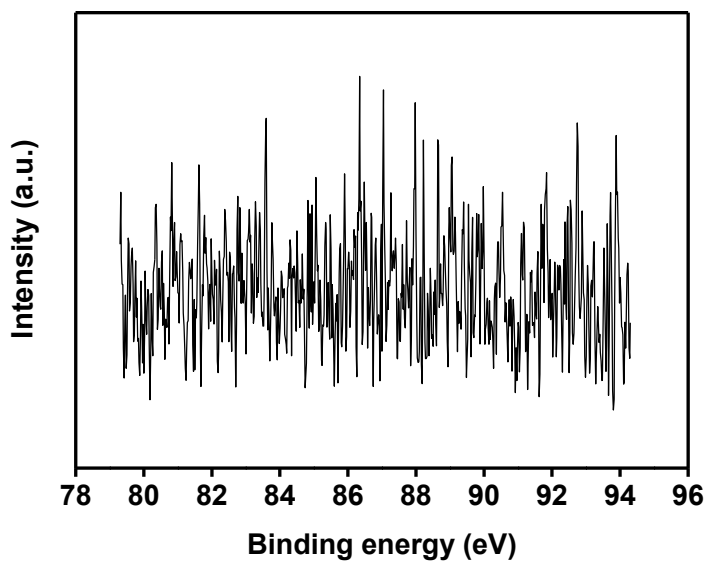

**Supporting Information Figure S10:** Au XPS spectrum of AuPd10@SiO<sub>2</sub>.

a)

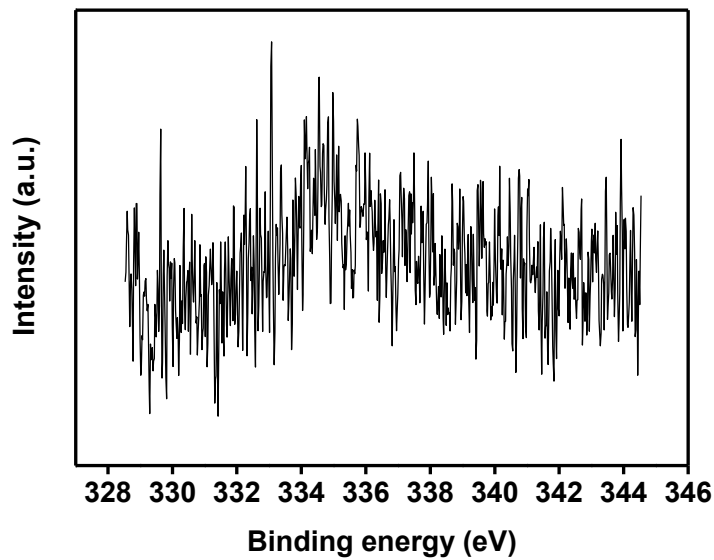

b)

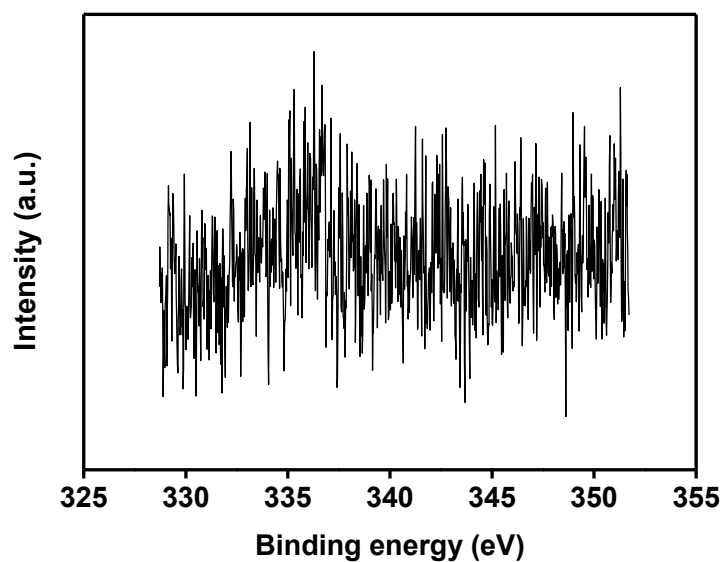

c)

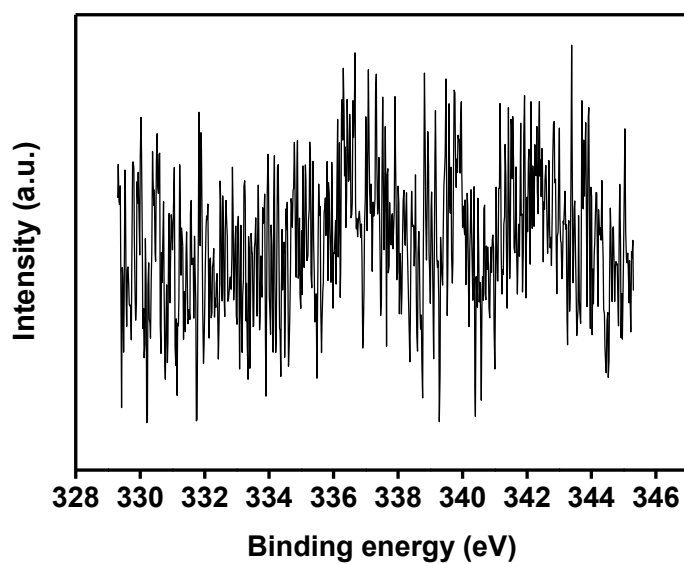

**Supporting Information Figure S11:** Pd XPS spectra of a) Au<sub>3</sub>Pd@SiO<sub>2</sub>, b) AuPd@SiO<sub>2</sub> and c) AuPd<sub>10</sub>@SiO<sub>2</sub>.

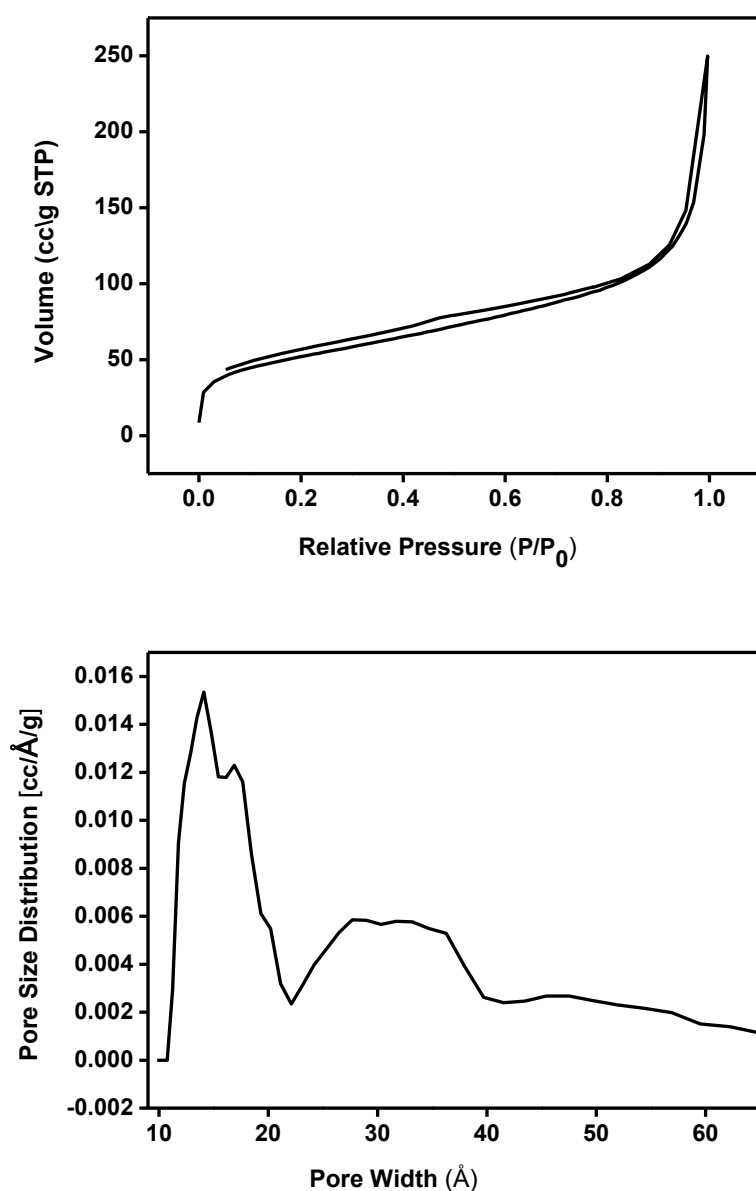

**Supporting Information Figure S12:** (top) N<sub>2</sub> adsorption – desorption isotherms of sample Au<sub>3</sub>Pd@SiO<sub>2</sub> (bottom) Pore size distribution calculated from the adsorption branch of the isotherms by DFT method.

|                                                                                |      |
|--------------------------------------------------------------------------------|------|
| N <sub>2</sub> uptake(cm <sup>3</sup> g <sup>-1</sup> STP)                     | 250  |
| Total Pore Volume <sup>d</sup> (cm <sup>3</sup> g <sup>-1</sup> ) <sup>a</sup> | 0.38 |
| Micropore Volume (cm <sup>3</sup> g <sup>-1</sup> ) <sup>b</sup>               | 0.02 |

<sup>a</sup>Total pore volume measured at a relative pressure of P/P<sub>0</sub> = 0.99. <sup>b</sup> Calculated through t-plot analysis as a function of relative pressure using the Broekhoff de Boer model.

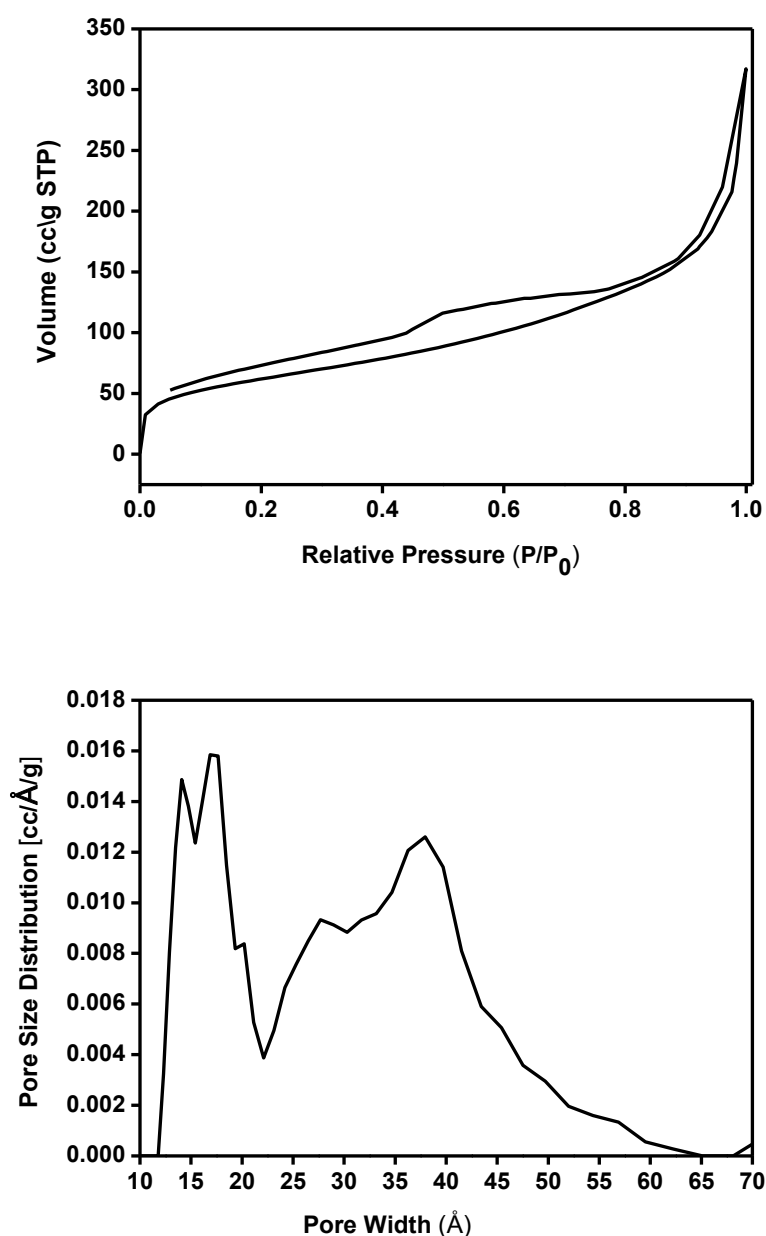

**Supporting Information Figure S13:** (top) N<sub>2</sub> adsorption – desorption isotherms of sample AuPd@SiO<sub>2</sub> (bottom) Pore size distribution calculated from the adsorption branch of the isotherms by DFT method.

|                                                                                |       |
|--------------------------------------------------------------------------------|-------|
| N <sub>2</sub> uptake(cm <sup>3</sup> g <sup>-1</sup> STP)                     | 317   |
| Total Pore Volume <sup>d</sup> (cm <sup>3</sup> g <sup>-1</sup> ) <sup>a</sup> | 0.49  |
| Micropore Volume (cm <sup>3</sup> g <sup>-1</sup> ) <sup>b</sup>               | 0.006 |

<sup>a</sup>Total pore volume measured at a relative pressure of P/P<sub>0</sub> = 0.99. <sup>b</sup> Calculated through t-plot analysis as a function of relative pressure using the Broekhoff de Boer model.

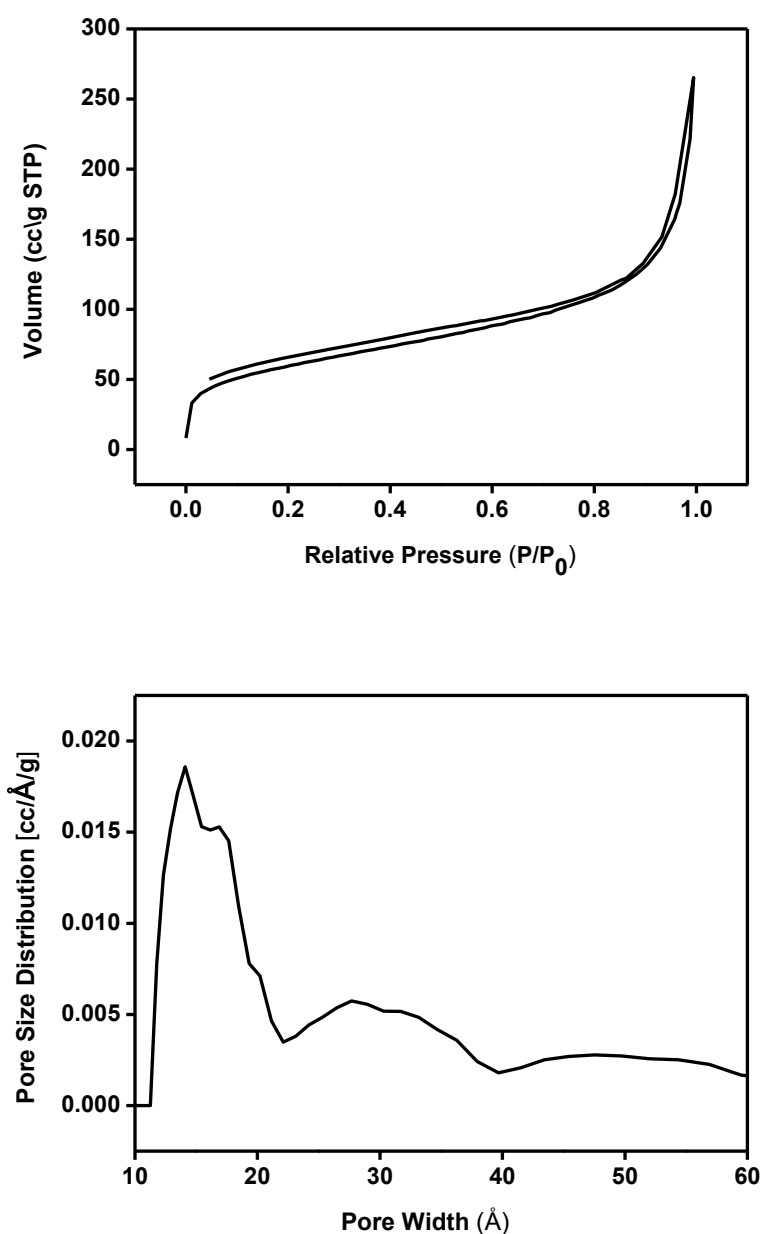

**Supporting Information Figure S14:** (top) N<sub>2</sub> adsorption – desorption isotherms of sample AuPd10@SiO<sub>2</sub> (bottom) Pore size distribution calculated from the adsorption branch of the isotherms by DFT method.

|                                                                                |      |
|--------------------------------------------------------------------------------|------|
| N <sub>2</sub> uptake(cm <sup>3</sup> g <sup>-1</sup> STP)                     | 265  |
| Total Pore Volume <sup>d</sup> (cm <sup>3</sup> g <sup>-1</sup> ) <sup>a</sup> | 0.41 |
| Micropore Volume (cm <sup>3</sup> g <sup>-1</sup> ) <sup>b</sup>               | 0.04 |

<sup>a</sup>Total pore volume measured at a relative pressure of  $P/P_0 = 0.99$ . <sup>b</sup> Calculated through t-plot analysis as a function of relative pressure using the Broekhoff de Boer model.

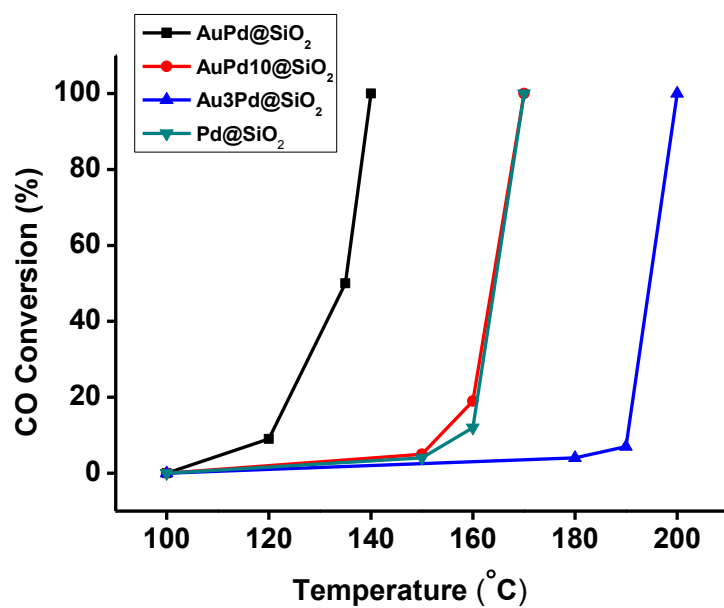

**Supporting Information Figure S15:** CO conversion with temperature by the four catalysts.

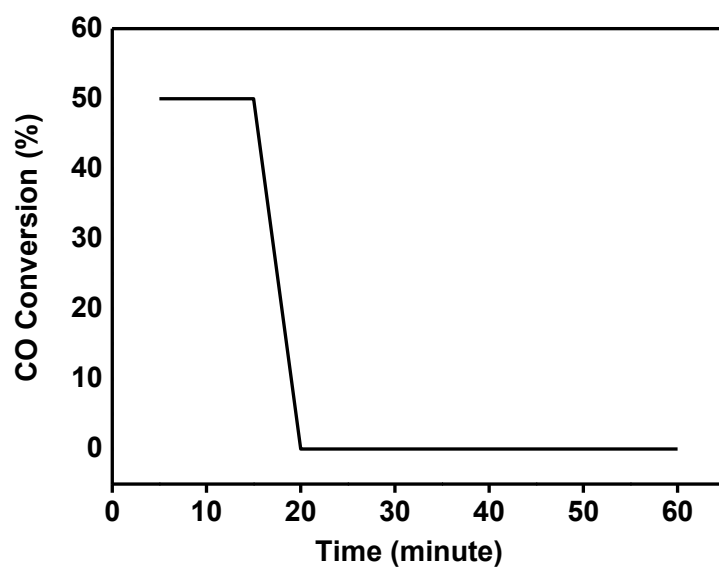

**Supporting Information Figure S16:** CO conversion as a function of time-on-stream by Au@SiO<sub>2</sub> at room temperature (28 °C).

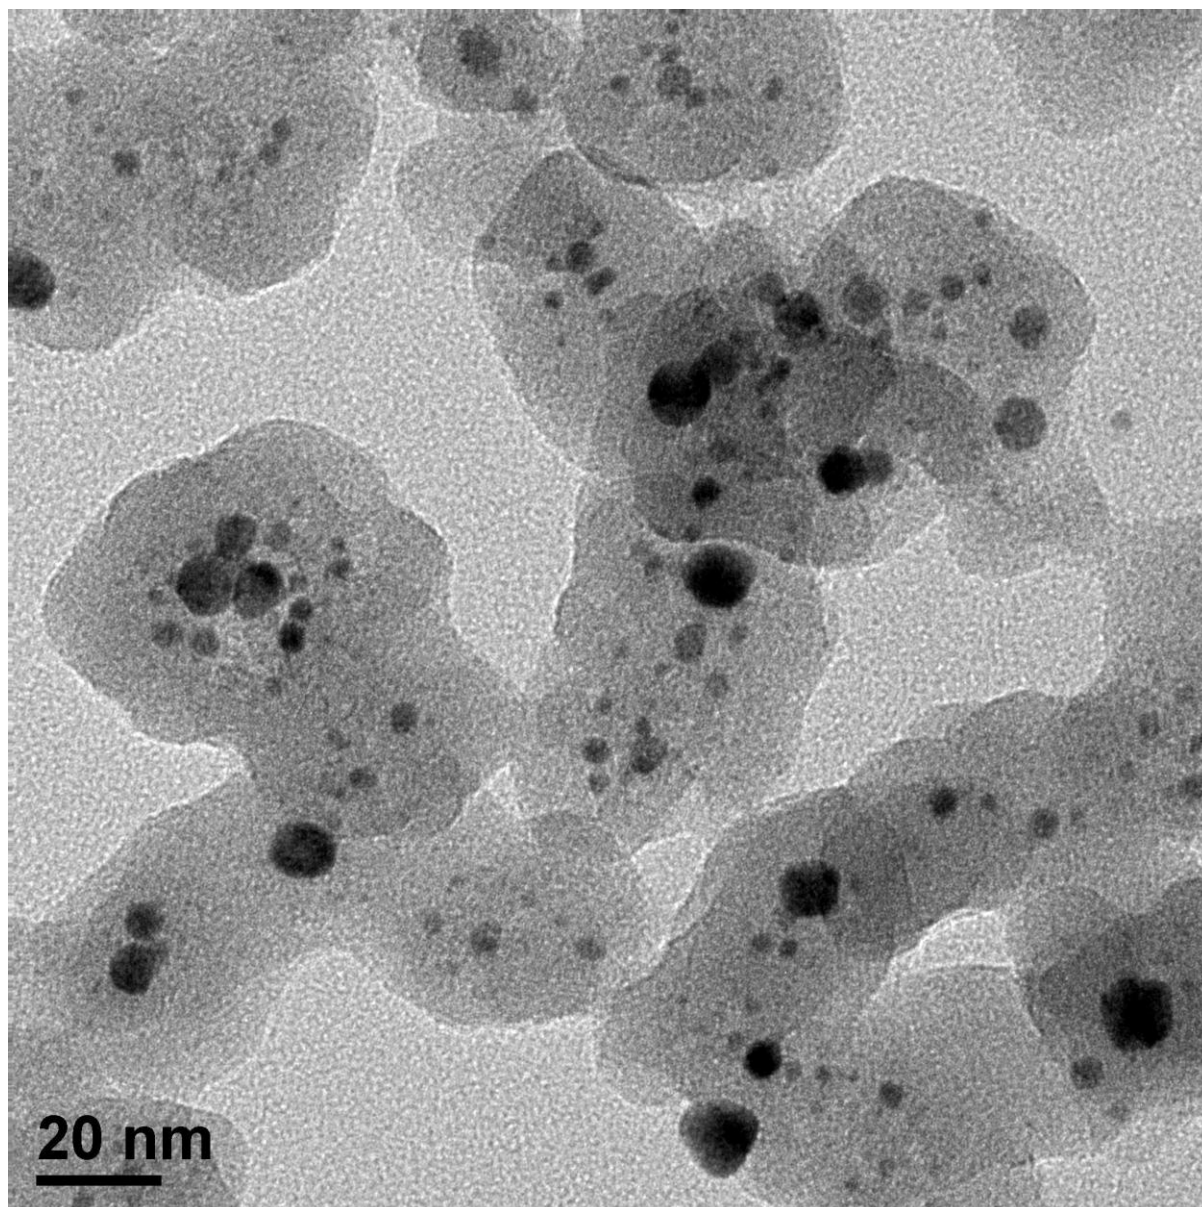

**Supporting Information Figure S17:** HRTEM image of Au@SiO<sub>2</sub> catalyst after CO oxidation study.

a)

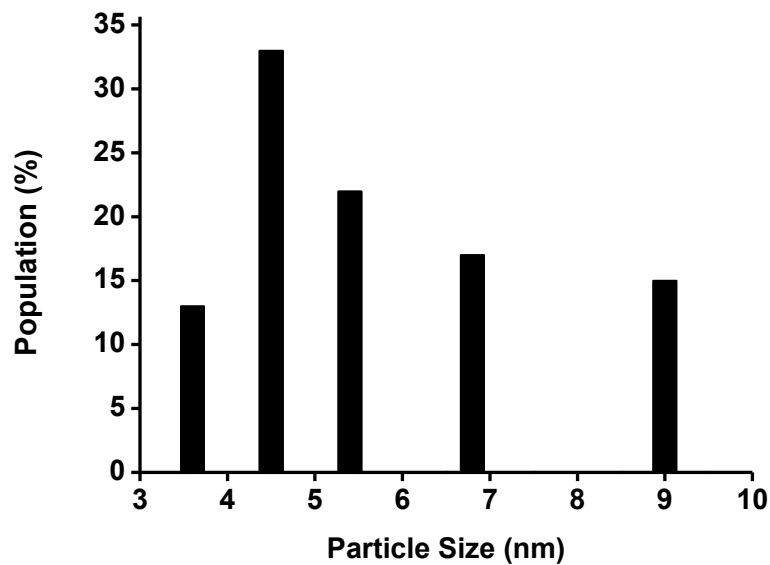

b)

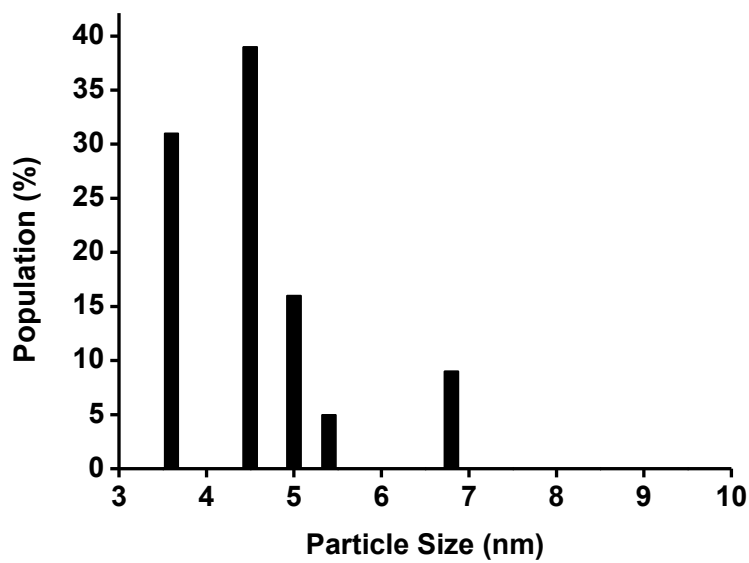

c)

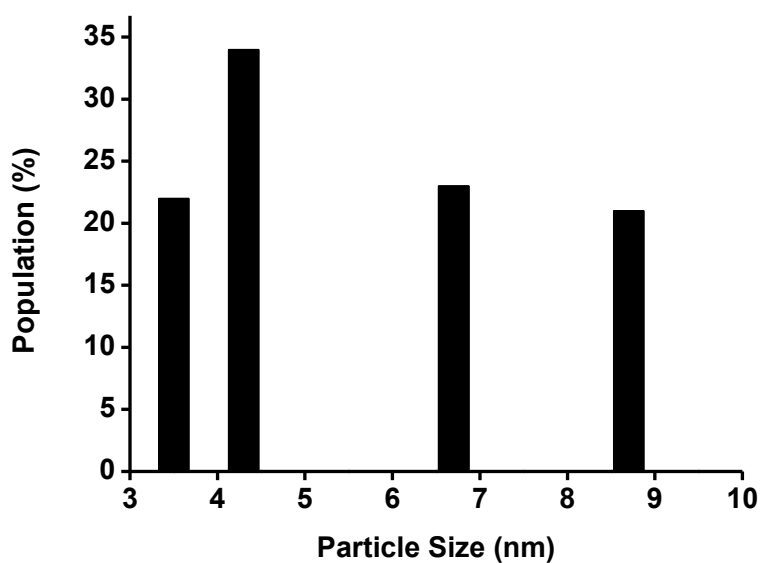

**Supporting Information Figure S18:** Particle size distribution graph of a) Au<sub>3</sub>Pd@SiO<sub>2</sub>, b) AuPd@SiO<sub>2</sub> and C) AuPd<sub>10</sub>@SiO<sub>2</sub> catalysts calcined at 750 °C.

#### References:

1. A. Samanta, B. B. Dhar and R. N. Devi, *J. Phys. Chem. C*, 2012, **116**, 1748.
2. A. Samanta, B. B. Dhar and R. N. Devi, *ChemCatChem*, 2013, **5**, 1911.
